# Supplementary material for: Genome-wide analysis of sugar transporter genes in maize (Zea mays L.): identification, characterization and their expression profiles during kernel development
Source: PeerJ. 2023 Nov 17;11:e16423. doi: 10.7717/peerj.16423 (PMC10658905; doi:10.7717/peerj.16423)
Supplement: Dataset S1 [file peerj-11-16423-s006.xlsx]

## Sheet: Se-ZmINT1
		Well	Flour	Cq			AVER	ΔCt	ΔΔCt	_ΔΔCt	2_ΔΔCt	SD
actin	Se2	A01	SYBR	31.7647			32.1501
actin	Se2	A02	SYBR	32.4874
actin	Se2	A03	SYBR	32.1982
actin	Se4	A04	SYBR	30.7367			30.769
actin	Se4	A05	SYBR	30.2828
actin	Se4	A06	SYBR	31.2874
actin	Se6	A07	SYBR	31.6457			31.5718
actin	Se6	A08	SYBR	31.9765
actin	Se6	A09	SYBR	31.0933
actin	Se8	A10	SYBR	32.8763			33.3426
actin	Se8	A11	SYBR	33.4763
actin	Se8	A12	SYBR	33.6752
actin	Se10	B01	SYBR	32.3655			32.2698
actin	Se10		SYBR	32.8874
actin	Se10	B03	SYBR	31.5567
actin	Se12	B04	SYBR	33.8848			33.7977
actin	Se12	B05	SYBR	33.2987
actin	Se12	B06	SYBR	34.2094
actin	Se14	B07	SYBR	34.6837			34.2119
actin	Se14	B08	SYBR	33.7874
actin	Se14	B09	SYBR	34.1645
actin	Se16	B10	SYBR	31.9875			31.8539
actin	Se16	B11	SYBR	31.1876
actin	Se16	B12	SYBR	32.3865
actin	Se18	C01	SYBR	30.8765			31.057
actin	Se18	C02	SYBR	31.2375
actin	Se18	C03	SYBR	30.4O238
actin	Se20	C04	SYBR	33.7658			33.2813
actin	Se20	C05	SYBR	32.8935
actin	Se20	C06	SYBR	33.1845
actin	Se22	C07	SYBR	30.679			31.5158
actin	Se22	C08	SYBR	31.7835
actin	Se22	C09	SYBR	32.0848
actin	Se24	C10	SYBR	33.8958			34.3931
actin	Se24	C11	SYBR	34.4987
actin	Se24	C12	SYBR	34.7848
actin	Se28	D01	SYBR	35.7562			35.2752
actin	Se28	D02	SYBR	34.6848
actin	Se28	D03	SYBR	35.3848
ZmINT1	Se2	E01	SYBR	32.5139			32.5766	0.42653	0		1	0.061903
ZmINT1	Se2	E02	SYBR	32.6376
ZmINT1	Se2	E03	SYBR	32.5783
ZmINT1	Se4	E04	SYBR	32.0387			32.1369	1.36787	0.941339	-0.941339	0.886118	0.086942
ZmINT1	Se4	E05	SYBR	32.1675
ZmINT1	Se4	E06	SYBR	32.2043
ZmINT1	Se6	E07	SYBR	32.9085			32.9504	1.37857	0.952039	-0.952039	0.906377	0.0494051
ZmINT1	Se6	E08	SYBR	33.0049
ZmINT1	Se6	E09	SYBR	32.9379
ZmINT1	Se8	E10	SYBR	33.7103			33.7287	0.386097	-0.981772	0.981772	0.963877	0.0251991
ZmINT1	Se8	E11	SYBR	33.7184
ZmINT1	Se8	E12	SYBR	33.7574
ZmINT1	Se10	F01	SYBR	31.6466			31.6792	-0.590683	-1.01721	1.01721	1.03472	0.0303529
ZmINT1	Se10	F02	SYBR	31.6843
ZmINT1	Se10	F03	SYBR	31.7066
ZmINT1	Se12	F04	SYBR	33.2736			33.3118	-0.485807	-0.912337	0.912337	0.832359	0.0663445
ZmINT1	Se12	F05	SYBR	33.3885
ZmINT1	Se12	F06	SYBR	33.2735
ZmINT1	Se14	F07	SYBR	33.8367			33.8485	-0.363335	-0.789865	0.789865	0.623887	0.0317612
ZmINT1	Se14	F08	SYBR	33.8244
ZmINT1	Se14	F09	SYBR	33.8845
ZmINT1	Se16	F10	SYBR	31.6716			31.6449	-0.208953	-0.635483	0.635483	0.403839	0.0505793
ZmINT1	Se16	F11	SYBR	31.6765
ZmINT1	Se16	F12	SYBR	31.5866
ZmINT1	Se18	G01	SYBR	30.8898			30.8716	-0.185399	-0.61193	0.61193	0.374458	0.0373615
ZmINT1	Se18	G02	SYBR	30.8963
ZmINT1	Se18	G03	SYBR	30.8286
ZmINT1	Se20	G04	SYBR	33.1826			33.1762	-0.105079	-0.531609	0.531609	0.282608	0.0747158
ZmINT1	Se20	G05	SYBR	33.0985
ZmINT1	Se20	G06	SYBR	33.2475
ZmINT1	Se22	G07	SYBR	31.4037			31.4482	-0.0675477	-0.494078	0.494078	0.244113	0.0541168
ZmINT1	Se22	G08	SYBR	31.5085
ZmINT1	Se22	G09	SYBR	31.4325
ZmINT1	Se24	G10	SYBR	34.4287			34.3943	0.00122306	-0.425307	0.425307	0.180886	0.0331892
ZmINT1	Se24	G11	SYBR	34.3624
ZmINT1	Se24	G12	SYBR	34.3918
ZmINT1	Se28	H01	SYBR	35.4058			35.3343	0.0591083	-0.367422	0.367422	0.134999	0.0632602
ZmINT1	Se28	H02	SYBR	35.2856
ZmINT1	Se28	H03	SYBR	35.3115

## Sheet: Se-ZmINT4
		Well	Flour	Cq			AVER	ΔCt	ΔΔCt	_ΔΔCt	2_ΔΔCt	SD
actin	Se2	A01	SYBR	31.5467			31.7937
actin	Se2	A02	SYBR	31.7879
actin	Se2	A03	SYBR	32.0466
actin	Se4	A04	SYBR	32.4657			32.567
actin	Se4	A05	SYBR	32.7984
actin	Se4	A06	SYBR	32.437
actin	Se6	A07	SYBR	34.2477			33.9057
actin	Se6	A08	SYBR	33.7899
actin	Se6	A09	SYBR	33.6794
actin	Se8	A10	SYBR	31.9766			31.6323
actin	Se8	A11	SYBR	31.2346
actin	Se8	A12	SYBR	31.6857
actin	Se10	B01	SYBR	32.8987			32.3401
actin	Se10		SYBR	32.1433
actin	Se10	B03	SYBR	31.9784
actin	Se12	B04	SYBR	30.5468			30.664
actin	Se12	B05	SYBR	30.3578
actin	Se12	B06	SYBR	31.0874
actin	Se14	B07	SYBR	34.1583			34.1105
actin	Se14	B08	SYBR	34.2768
actin	Se14	B09	SYBR	33.8965
actin	Se16	B10	SYBR	31.5366			31.3566
actin	Se16	B11	SYBR	31.0758
actin	Se16	B12	SYBR	31.4573
actin	Se18	C01	SYBR	32.7754			32.4598
actin	Se18	C02	SYBR	32.2566
actin	Se18	C03	SYBR	32.3475
actin	Se20	C04	SYBR	33.1563			33.5184
actin	Se20	C05	SYBR	33.6634
actin	Se20	C06	SYBR	33.7355
actin	Se22	C07	SYBR	32.9648			32.6464
actin	Se22	C08	SYBR	32.5377
actin	Se22	C09	SYBR	32.4369
actin	Se24	C10	SYBR	31.7886			31.6715
actin	Se24	C11	SYBR	31.3366
actin	Se24	C12	SYBR	31.8895
actin	Se28	D01	SYBR	33.7366			33.7267
actin	Se28	D02	SYBR	33.9764
actin	Se28	D03	SYBR	33.4669
ZmINT4	Se2	E01	SYBR	31.8064			31.7577	-0.0359983	0		1	0.0647302
ZmINT4	Se2	E02	SYBR	31.7826
ZmINT4	Se2	E03	SYBR	31.6843
ZmINT4	Se4	E04	SYBR	31.4586			31.496	-1.07105	-1.03505	1.03505	1.07132	0.0342523
ZmINT4	Se4	E05	SYBR	31.5258
ZmINT4	Se4	E06	SYBR	31.5036
ZmINT4	Se6	E07	SYBR	32.9085			32.9156	-0.990044	-0.954045	0.954045	0.910203	0.0196792
ZmINT4	Se6	E08	SYBR	32.9005
ZmINT4	Se6	E09	SYBR	32.9379
ZmINT4	Se8	E10	SYBR	31.691			31.7335	0.101185	1.17223	-1.17223	1.37413	0.0368773
ZmINT4	Se8	E11	SYBR	31.7518
ZmINT4	Se8	E12	SYBR	31.7576
ZmINT4	Se10	F01	SYBR	31.2947			31.251	-1.08907	-1.05307	1.05307	1.10895	0.0466339
ZmINT4	Se10	F02	SYBR	31.2019
ZmINT4	Se10	F03	SYBR	31.2566
ZmINT4	Se12	F04	SYBR	31.5274			31.4895	0.82554	0.861538	-0.861538	0.742248	0.0542685
ZmINT4	Se12	F05	SYBR	31.5139
ZmINT4	Se12	F06	SYBR	31.4274
ZmINT4	Se14	F07	SYBR	33.3367			33.3679	-0.742651	-0.706653	0.706653	0.499358	0.027021
ZmINT4	Se14	F08	SYBR	33.3824
ZmINT4	Se14	F09	SYBR	33.3845
ZmINT4	Se16	F10	SYBR	32.0487			32.0728	0.716212	0.75221	-0.75221	0.56582	0.0209211
ZmINT4	Se16	F11	SYBR	32.0839
ZmINT4	Se16	F12	SYBR	32.0859
ZmINT4	Se18	G01	SYBR	31.6898			31.7048	-0.75501	-0.719011	0.719011	0.516977	0.0272941
ZmINT4	Se18	G02	SYBR	31.7363
ZmINT4	Se18	G03	SYBR	31.6883
ZmINT4	Se20	G04	SYBR	32.9383			32.9359	-0.582541	-0.546543	0.546543	0.298709	0.0129784
ZmINT4	Se20	G05	SYBR	32.9218
ZmINT4	Se20	G06	SYBR	32.9475
ZmINT4	Se22	G07	SYBR	32.284			32.2578	-0.388623	-0.352625	0.352625	0.124344	0.0300105
ZmINT4	Se22	G08	SYBR	32.2251
ZmINT4	Se22	G09	SYBR	32.2643
ZmINT4	Se24	G10	SYBR	32.0429			32.0228	0.351229	0.387228	-0.387228	0.149945	0.0316829
ZmINT4	Se24	G11	SYBR	31.9862
ZmINT4	Se24	G12	SYBR	32.0392
ZmINT4	Se28	H01	SYBR	34.0841			34.1081	0.381404	0.417402	-0.417402	0.174225	0.0464051
ZmINT4	Se28	H02	SYBR	34.0786
ZmINT4	Se28	H03	SYBR	34.1615

## Sheet: Se-ZmpGlcT2
		Well	Flour	Cq			AVER	ΔCt	ΔΔCt	_ΔΔCt	2_ΔΔCt	SD
actin	Se2	A01	SYBR	30.2652			30.1631
actin	Se2	A02	SYBR	30.1555
actin	Se2	A03	SYBR	30.0686
actin	Se4	A04	SYBR	28.9486			28.6914
actin	Se4	A05	SYBR	28.4569
actin	Se4	A06	SYBR	28.6688
actin	Se6	A07	SYBR	30.1325			30.4215
actin	Se6	A08	SYBR	30.7864
actin	Se6	A09	SYBR	30.3457
actin	Se8	A10	SYBR	31.4366			31.6902
actin	Se8	A11	SYBR	31.7888
actin	Se8	A12	SYBR	31.8454
actin	Se10	B01	SYBR	30.8547			30.589
actin	Se10		SYBR	30.5565
actin	Se10	B03	SYBR	30.3557
actin	Se12	B04	SYBR	30.8647			30.6918
actin	Se12	B05	SYBR	30.7738
actin	Se12	B06	SYBR	30.4368
actin	Se14	B07	SYBR	29.7548			29.7428
actin	Se14	B08	SYBR	29.6863
actin	Se14	B09	SYBR	29.7874
actin	Se16	B10	SYBR	30.5756			30.5648
actin	Se16	B11	SYBR	30.3643
actin	Se16	B12	SYBR	30.7544
actin	Se18	C01	SYBR	31.4676			31.5972
actin	Se18	C02	SYBR	31.5675
actin	Se18	C03	SYBR	31.7565
actin	Se20	C04	SYBR	32.1235			32.102
actin	Se20	C05	SYBR	32.2358
actin	Se20	C06	SYBR	31.9466
actin	Se22	C07	SYBR	29.8576			29.607
actin	Se22	C08	SYBR	29.6099
actin	Se22	C09	SYBR	29.3535
actin	Se24	C10	SYBR	30.8975			31.0216
actin	Se24	C11	SYBR	30.6547I9
actin	Se24	C12	SYBR	31.1458
actin	Se28	D01	SYBR	32.6987			32.5966
actin	Se28	D02	SYBR	32.4924
actin	Se28	D03	SYBR	32.5988
ZmpGlcT2	Se2	E01	SYBR	31.8064			31.7577	1.59464	0		1	0.0647302
ZmpGlcT2	Se2	E02	SYBR	31.7826
ZmpGlcT2	Se2	E03	SYBR	31.6843
ZmpGlcT2	Se4	E04	SYBR	31.3459			31.3619	2.67049	1.07585	-1.07585	1.15745	0.0673306
ZmpGlcT2	Se4	E05	SYBR	31.4358
ZmpGlcT2	Se4	E06	SYBR	31.304
ZmpGlcT2	Se6	E07	SYBR	32.8808			33.0549	2.63337	1.03873	-1.03873	1.07896	0.159403
ZmpGlcT2	Se6	E08	SYBR	33.09
ZmpGlcT2	Se6	E09	SYBR	33.1938
ZmpGlcT2	Se8	E10	SYBR	33.0969			33.2413	1.55105	-1.11944	1.11944	1.25315	0.126049
ZmpGlcT2	Se8	E11	SYBR	33.2975
ZmpGlcT2	Se8	E12	SYBR	33.3294
ZmpGlcT2	Se10	F01	SYBR	31.2095			31.2226	0.63366	-0.960984	0.960984	0.92349	0.068316
ZmpGlcT2	Se10	F02	SYBR	31.1619
ZmpGlcT2	Se10	F03	SYBR	31.2966
ZmpGlcT2	Se12	F04	SYBR	30.7727			30.8687	0.176889	-1.41776	1.41776	2.01003	0.11118
ZmpGlcT2	Se12	F05	SYBR	30.9905
ZmpGlcT2	Se12	F06	SYBR	30.8427
ZmpGlcT2	Se14	F07	SYBR	32.6337			32.6566	2.91377	1.31912	-1.31912	1.74008	0.0451412
ZmpGlcT2	Se14	F08	SYBR	32.6275
ZmpGlcT2	Se14	F09	SYBR	32.7086
ZmpGlcT2	Se16	F10	SYBR	30.8029			30.903	0.33824	-1.2564	1.2564	1.57855	0.0975123
ZmpGlcT2	Se16	F11	SYBR	30.9977
ZmpGlcT2	Se16	F12	SYBR	30.9085
ZmpGlcT2	Se18	G01	SYBR	31.869			31.8665	0.269245	-1.3254	1.3254	1.75668	0.0864371
ZmpGlcT2	Se18	G02	SYBR	31.9516
ZmpGlcT2	Se18	G03	SYBR	31.7788
ZmpGlcT2	Se20	G04	SYBR	32.1554			32.2243	0.122303	-1.47234	1.47234	2.16779	0.079229
ZmpGlcT2	Se20	G05	SYBR	32.3108
ZmpGlcT2	Se20	G06	SYBR	32.2065
ZmpGlcT2	Se22	G07	SYBR	32.6768			32.7098	3.10278	1.50814	-1.50814	2.27448	0.134677
ZmpGlcT2	Se22	G08	SYBR	32.8579
ZmpGlcT2	Se22	G09	SYBR	32.5947
ZmpGlcT2	Se24	G10	SYBR	30.9479			31.049	0.0273428	-1.5673	1.5673	2.45643	0.106337
ZmpGlcT2	Se24	G11	SYBR	31.1599
ZmpGlcT2	Se24	G12	SYBR	31.0392
ZmpGlcT2	Se28	H01	SYBR	32.7065			32.8205	0.223849	-1.3708	1.3708	1.87908	0.13353
ZmpGlcT2	Se28	H02	SYBR	32.9674
ZmpGlcT2	Se28	H03	SYBR	32.7876

## Sheet: Se-ZmpGlcT4
		Well	Flour	Cq			AVER	ΔCt	ΔΔCt	_ΔΔCt	2_ΔΔCt	SD
actin	Se2	A01	SYBR	31.5765			31.7373
actin	Se2	A02	SYBR	31.9675
actin	Se2	A03	SYBR	31.6677
actin	Se4	A04	SYBR	30.6875			30.6775
actin	Se4	A05	SYBR	30.9875
actin	Se4	A06	SYBR	30.3575
actin	Se6	A07	SYBR	32.9675			32.7789
actin	Se6	A08	SYBR	32.7794
actin	Se6	A09	SYBR	32.5897
actin	Se8	A10	SYBR	31.7795			31.7636
actin	Se8	A11	SYBR	31.5547
actin	Se8	A12	SYBR	31.9565
actin	Se10	B01	SYBR	29.6768			29.553
actin	Se10		SYBR	29.6342
actin	Se10	B03	SYBR	29.3479
actin	Se12	B04	SYBR	32.7863			32.5367
actin	Se12	B05	SYBR	32.3558
actin	Se12	B06	SYBR	32.468
actin	Se14	B07	SYBR	31.6735			31.6622
actin	Se14	B08	SYBR	31.8564
actin	Se14	B09	SYBR	31.4568
actin	Se16	B10	SYBR	33.0685			33.0931
actin	Se16	B11	SYBR	33.2244
actin	Se16	B12	SYBR	32.9864
actin	Se18	C01	SYBR	32.5688			32.8007
actin	Se18	C02	SYBR	32.9655
actin	Se18	C03	SYBR	32.8677
actin	Se20	C04	SYBR	33.9655			33.7893
actin	Se20	C05	SYBR	33.7565
actin	Se20	C06	SYBR	33.6459
actin	Se22	C07	SYBR	31.7867			31.6393
actin	Se22	C08	SYBR	31.7966
actin	Se22	C09	SYBR	31.3346
actin	Se24	C10	SYBR	30.3424			30.6079
actin	Se24	C11	SYBR	30.6857
actin	Se24	C12	SYBR	30.7956
actin	Se28	D01	SYBR	30.377			30.2314
actin	Se28	D02	SYBR	30.0767
actin	Se28	D03	SYBR	30.2406
ZmpGlcT4	Se2	E01	SYBR	32.7869			32.7714	1.03416	0		1	0.077224
ZmpGlcT4	Se2	E02	SYBR	32.6876
ZmpGlcT4	Se2	E03	SYBR	32.8397
ZmpGlcT4	Se4	E04	SYBR	30.707			30.6928	0.0152581	-1.0189	1.0189	1.03815	0.0259906
ZmpGlcT4	Se4	E05	SYBR	30.7086
ZmpGlcT4	Se4	E06	SYBR	30.6628
ZmpGlcT4	Se6	E07	SYBR	32.7699			32.7171	-0.0618319	-1.09599	1.09599	1.20119	0.0794927
ZmpGlcT4	Se6	E08	SYBR	32.6256
ZmpGlcT4	Se6	E09	SYBR	32.7557
ZmpGlcT4	Se8	E10	SYBR	32.8869			32.8555	1.09194	1.07669	-1.07669	1.15925	0.0573412
ZmpGlcT4	Se8	E11	SYBR	32.8903
ZmpGlcT4	Se8	E12	SYBR	32.7893
ZmpGlcT4	Se10	F01	SYBR	31.8091			31.7699	2.21691	1.18275	-1.18275	1.3989	0.0341511
ZmpGlcT4	Se10	F02	SYBR	31.7542
ZmpGlcT4	Se10	F03	SYBR	31.7465
ZmpGlcT4	Se12	F04	SYBR	32.5379			32.5144	-0.0222834	-1.05644	1.05644	1.11606	0.0627285
ZmpGlcT4	Se12	F05	SYBR	32.562
ZmpGlcT4	Se12	F06	SYBR	32.4433
ZmpGlcT4	Se14	F07	SYBR	31.6975			31.6703	0.00810698	-1.02605	1.02605	1.05278	0.0235234
ZmpGlcT4	Se14	F08	SYBR	31.6579
ZmpGlcT4	Se14	F09	SYBR	31.6557
ZmpGlcT4	Se16	F10	SYBR	33.1549			33.2056	0.112506	-0.92165	0.92165	0.849439	0.0558601
ZmpGlcT4	Se16	F11	SYBR	33.1965
ZmpGlcT4	Se16	F12	SYBR	33.2655
ZmpGlcT4	Se18	G01	SYBR	33.0148			32.9896	0.188919	-0.845237	0.845237	0.714426	0.0218167
ZmpGlcT4	Se18	G02	SYBR	32.9763
ZmpGlcT4	Se18	G03	SYBR	32.9776
ZmpGlcT4	Se20	G04	SYBR	33.9857			34.056	0.26674	-0.767416	0.767416	0.588928	0.0611802
ZmpGlcT4	Se20	G05	SYBR	34.0968
ZmpGlcT4	Se20	G06	SYBR	34.0856
ZmpGlcT4	Se22	G07	SYBR	31.9768			31.9707	0.331407	-0.702749	0.702749	0.493856	0.00532372
ZmpGlcT4	Se22	G08	SYBR	31.9669
ZmpGlcT4	Se22	G09	SYBR	31.9684
ZmpGlcT4	Se24	G10	SYBR	31.0179			31.049	0.441076	-0.59308	0.59308	0.351744	0.0369825
ZmpGlcT4	Se24	G11	SYBR	31.0899
ZmpGlcT4	Se24	G12	SYBR	31.0392
ZmpGlcT4	Se28	H01	SYBR	31.8899			31.9265	1.69512	0.660964	-0.660964	0.436873	0.0377932
ZmpGlcT4	Se28	H02	SYBR	31.9654
ZmpGlcT4	Se28	H03	SYBR	31.9244

## Sheet: Se-ZmPMT4
		Well	Flour	Cq			AVER	ΔCt	ΔΔCt	_ΔΔCt	2_ΔΔCt	SD
actin	Se2	A01	SYBR	30.5638			30.5212
actin	Se2	A02	SYBR	30.2455
actin	Se2	A03	SYBR	30.7544
actin	Se4	A04	SYBR	31.3468			31.5983
actin	Se4	A05	SYBR	31.6587
actin	Se4	A06	SYBR	31.7895
actin	Se6	A07	SYBR	30.8856			30.8308
actin	Se6	A08	SYBR	30.9643
actin	Se6	A09	SYBR	30.6426
actin	Se8	A10	SYBR	30.0687			30.2202
actin	Se8	A11	SYBR	30.3458
actin	Se8	A12	SYBR	30.246
actin	Se10	B01	SYBR	32.6756			32.7141
actin	Se10		SYBR	32.8988
actin	Se10	B03	SYBR	32.5679
actin	Se12	B04	SYBR	33.6754			33.6364
actin	Se12	B05	SYBR	33.8654
actin	Se12	B06	SYBR	33.3685
actin	Se14	B07	SYBR	32.9654			32.7989
actin	Se14	B08	SYBR	32.7856
actin	Se14	B09	SYBR	32.6456
actin	Se16	B10	SYBR	33.5347			33.741
actin	Se16	B11	SYBR	33.9637
actin	Se16	B12	SYBR	33.7247
actin	Se18	C01	SYBR	29.8657			29.7164
actin	Se18	C02	SYBR	29.648
actin	Se18	C03	SYBR	29.6355
actin	Se20	C04	SYBR	34.6787			34.661
actin	Se20	C05	SYBR	34.8565
actin	Se20	C06	SYBR	34.4476
actin	Se22	C07	SYBR	31.5765			31.575
actin	Se22	C08	SYBR	31.7899
actin	Se22	C09	SYBR	31.3588
actin	Se24	C10	SYBR	32.7856			32.641
actin	Se24	C11	SYBR	32.7897
actin	Se24	C12	SYBR	32.3477
actin	Se28	D01	SYBR	30.2457			30.4154
actin	Se28	D02	SYBR	30.4346
actin	Se28	D03	SYBR	30.5659
ZmPMT4	Se2	E01	SYBR	31.3427			31.46	0.938802	0		1	0.118539
ZmPMT4	Se2	E02	SYBR	31.4576
ZmPMT4	Se2	E03	SYBR	31.5797
ZmPMT4	Se4	E04	SYBR	31.4435			31.5065	-0.091815	-1.03062	1.03062	1.06217	0.0645646
ZmPMT4	Se4	E05	SYBR	31.5035
ZmPMT4	Se4	E06	SYBR	31.5726
ZmPMT4	Se6	E07	SYBR	32.927			32.8967	2.06588	1.12708	-1.12708	1.27031	0.0429051
ZmPMT4	Se6	E08	SYBR	32.8476
ZmPMT4	Se6	E09	SYBR	32.9156
ZmPMT4	Se8	E10	SYBR	31.3855			31.3622	1.14202	1.23384	-1.23384	1.52236	0.0386878
ZmPMT4	Se8	E11	SYBR	31.3836
ZmPMT4	Se8	E12	SYBR	31.3175
ZmPMT4	Se10	F01	SYBR	32.4077			32.3013	-0.41285	-1.35165	1.35165	1.82696	0.0941838
ZmPMT4	Se10	F02	SYBR	32.2286
ZmPMT4	Se10	F03	SYBR	32.2675
ZmPMT4	Se12	F04	SYBR	33.4384			33.5131	-0.123354	-1.06216	1.06216	1.12817	0.0781902
ZmPMT4	Se12	F05	SYBR	33.5944
ZmPMT4	Se12	F06	SYBR	33.5065
ZmPMT4	Se14	F07	SYBR	32.8079			32.8373	0.0384803	-0.900321	0.900321	0.810579	0.0257891
ZmPMT4	Se14	F08	SYBR	32.8484
ZmPMT4	Se14	F09	SYBR	32.8558
ZmPMT4	Se16	F10	SYBR	34.0098			33.9707	0.229719	-0.709083	0.709083	0.502799	0.0342591
ZmPMT4	Se16	F11	SYBR	33.9457
ZmPMT4	Se16	F12	SYBR	33.9568
ZmPMT4	Se18	G01	SYBR	31.3057			31.2919	1.57554	0.636742	-0.636742	0.40544	0.0518985
ZmPMT4	Se18	G02	SYBR	31.2345
ZmPMT4	Se18	G03	SYBR	31.3356
ZmPMT4	Se20	G04	SYBR	35.0685			35.1289	0.467975	-0.470826	0.470826	0.221677	0.0727356
ZmPMT4	Se20	G05	SYBR	35.2097
ZmPMT4	Se20	G06	SYBR	35.1086
ZmPMT4	Se22	G07	SYBR	31.8768			31.9061	0.331046	-0.607755	0.607755	0.369367	0.0540314
ZmPMT4	Se22	G08	SYBR	31.8731
ZmPMT4	Se22	G09	SYBR	31.9684
ZmPMT4	Se24	G10	SYBR	33.067			33.1394	0.498389	-0.440413	0.440413	0.193964	0.0626887
ZmPMT4	Se24	G11	SYBR	33.1742
ZmPMT4	Se24	G12	SYBR	33.1769
ZmPMT4	Se28	H01	SYBR	31.7554			31.7237	1.30836	0.369555	-0.369555	0.136571	0.0297057
ZmPMT4	Se28	H02	SYBR	31.6965
ZmPMT4	Se28	H03	SYBR	31.7192

## Sheet: Se-ZmPMT5
		Well	Flour	Cq			AVER	ΔCt	ΔΔCt	_ΔΔCt	2_ΔΔCt	SD
actin	Se2	A01	SYBR	31.547			31.4238
actin	Se2	A02	SYBR	31.3565
actin	Se2	A03	SYBR	31.368
actin	Se4	A04	SYBR	30.6785			30.7002
actin	Se4	A05	SYBR	30.8544
actin	Se4	A06	SYBR	30.5677
actin	Se6	A07	SYBR	29.7856			29.6965
actin	Se6	A08	SYBR	29.5581
actin	Se6	A09	SYBR	29.7457
actin	Se8	A10	SYBR	28.707			28.5884
actin	Se8	A11	SYBR	28.5787
actin	Se8	A12	SYBR	28.4796
actin	Se10	B01	SYBR	32.7973			32.6411
actin	Se10		SYBR	32.648
actin	Se10	B03	SYBR	32.4781
actin	Se12	B04	SYBR	31.97			31.867
actin	Se12	B05	SYBR	31.893
actin	Se12	B06	SYBR	31.7379
actin	Se14	B07	SYBR	30.8788			30.8041
actin	Se14	B08	SYBR	30.8547
actin	Se14	B09	SYBR	30.6787
actin	Se16	B10	SYBR	34.6785			34.5727
actin	Se16	B11	SYBR	34.3608
actin	Se16	B12	SYBR	34.6788
actin	Se18	C01	SYBR	31.6405			31.5493
actin	Se18	C02	SYBR	31.5494
actin	Se18	C03	SYBR	31.458
actin	Se20	C04	SYBR	29.6794			29.7381
actin	Se20	C05	SYBR	29.5786
actin	Se20	C06	SYBR	29.9565
actin	Se22	C07	SYBR	30.3546			30.2542
actin	Se22	C08	SYBR	30.2646
actin	Se22	C09	SYBR	30.1436
actin	Se24	C10	SYBR	34.8974			34.8546
actin	Se24	C11	SYBR	34.668
actin	Se24	C12	SYBR	34.9984
actin	Se28	D01	SYBR	33.7899			33.8297
actin	Se28	D02	SYBR	33.7346
actin	Se28	D03	SYBR	33.9647
ZmPMT5	Se2	E01	SYBR	31.1165			31.1456	-0.27821	0		1	0.0358685
ZmPMT5	Se2	E02	SYBR	31.1347
ZmPMT5	Se2	E03	SYBR	31.1857
ZmPMT5	Se4	E04	SYBR	31.4135			31.4909	0.790739	1.06895	-1.06895	1.14265	0.0719163
ZmPMT5	Se4	E05	SYBR	31.5035
ZmPMT5	Se4	E06	SYBR	31.5557
ZmPMT5	Se6	E07	SYBR	30.5468			30.4978	0.801353	1.07956	-1.07956	1.16546	0.105394
ZmPMT5	Se6	E08	SYBR	30.5698
ZmPMT5	Se6	E09	SYBR	30.3769
ZmPMT5	Se8	E10	SYBR	30.5966			30.5431	1.95469	1.16396	-1.16396	1.35479	0.0688493
ZmPMT5	Se8	E11	SYBR	30.4654
ZmPMT5	Se8	E12	SYBR	30.5674
ZmPMT5	Se10	F01	SYBR	31.4368			31.3864	-1.25473	-0.976515	0.976515	0.953582	0.04387
ZmPMT5	Se10	F02	SYBR	31.3565
ZmPMT5	Se10	F03	SYBR	31.366
ZmPMT5	Se12	F04	SYBR	32.5859			32.5294	0.662471	0.940681	-0.940681	0.884881	0.0556581
ZmPMT5	Se12	F05	SYBR	32.4746
ZmPMT5	Se12	F06	SYBR	32.5279
ZmPMT5	Se14	F07	SYBR	31.3969			31.3637	0.559665	0.837876	-0.837876	0.702036	0.0770414
ZmPMT5	Se14	F08	SYBR	31.4187
ZmPMT5	Se14	F09	SYBR	31.2757
ZmPMT5	Se16	F10	SYBR	33.6281			33.6042	-0.968486	-0.690275	0.690275	0.47648	0.0510058
ZmPMT5	Se16	F11	SYBR	33.6389
ZmPMT5	Se16	F12	SYBR	33.5457
ZmPMT5	Se18	G01	SYBR	31.7674			31.7421	0.192831	0.471042	-0.471042	0.22188	0.0791379
ZmPMT5	Se18	G02	SYBR	31.6535
ZmPMT5	Se18	G03	SYBR	31.8056
ZmPMT5	Se20	G04	SYBR	30.0369			29.9836	0.245454	0.523664	-0.523664	0.274224	0.0502604
ZmPMT5	Se20	G05	SYBR	29.9769
ZmPMT5	Se20	G06	SYBR	29.937
ZmPMT5	Se22	G07	SYBR	30.3865			30.4292	0.174909	0.453119	-0.453119	0.205317	0.0835689
ZmPMT5	Se22	G08	SYBR	30.3755
ZmPMT5	Se22	G09	SYBR	30.5254
ZmPMT5	Se24	G10	SYBR	34.1679			34.1729	-0.68167	-0.403459	0.403459	0.162779	0.0283266
ZmPMT5	Se24	G11	SYBR	34.2034
ZmPMT5	Se24	G12	SYBR	34.1475
ZmPMT5	Se28	H01	SYBR	33.2358			33.1957	-0.634042	-0.355832	0.355832	0.126616	0.045901
ZmPMT5	Se28	H02	SYBR	33.1456
ZmPMT5	Se28	H03	SYBR	33.2057

## Sheet: Se-ZmPMT8
		Well	Flour	Cq			AVER	ΔCt	ΔΔCt	_ΔΔCt	2_ΔΔCt	SD
actin	Se2	A01	SYBR	30.5745			30.6586
actin	Se2	A02	SYBR	30.6576
actin	Se2	A03	SYBR	30.7436
actin	Se4	A04	SYBR	31.3765			31.4636
actin	Se4	A05	SYBR	31.5798
actin	Se4	A06	SYBR	31.4346
actin	Se6	A07	SYBR	32.8778			32.8151
actin	Se6	A08	SYBR	32.7785
actin	Se6	A09	SYBR	32.789
actin	Se8	A10	SYBR	32.4678			32.4382
actin	Se8	A11	SYBR	32.3569
actin	Se8	A12	SYBR	32.4898
actin	Se10	B01	SYBR	30.5789			30.5048
actin	Se10		SYBR	30.4569
actin	Se10	B03	SYBR	30.4788
actin	Se12	B04	SYBR	29.6754			29.5739
actin	Se12	B05	SYBR	29.5895
actin	Se12	B06	SYBR	29.4569
actin	Se14	B07	SYBR	33.8787			33.8114
actin	Se14	B08	SYBR	33.8767
actin	Se14	B09	SYBR	33.679
actin	Se16	B10	SYBR	35.4784			35.4336
actin	Se16	B11	SYBR	35.2547
actin	Se16	B12	SYBR	35.5677
actin	Se18	C01	SYBR	32.788			32.4744
actin	Se18	C02	SYBR	32.2787
actin	Se18	C03	SYBR	32.3566
actin	Se20	C04	SYBR	28.5677			28.5381
actin	Se20	C05	SYBR	28.4677
actin	Se20	C06	SYBR	28.579
actin	Se22	C07	SYBR	31.7865			31.7543
actin	Se22	C08	SYBR	31.6788
actin	Se22	C09	SYBR	31.7975
actin	Se24	C10	SYBR	35.8678			35.804
actin	Se24	C11	SYBR	35.8547
actin	Se24	C12	SYBR	35.6895
actin	Se28	D01	SYBR	32.6765			32.6439
actin	Se28	D02	SYBR	32.6784
actin	Se28	D03	SYBR	32.5769
ZmPMT8	Se2	E01	SYBR	34.8865			34.8112	4.15263	0		1	0.11474
ZmPMT8	Se2	E02	SYBR	34.6791
ZmPMT8	Se2	E03	SYBR	34.8679
ZmPMT8	Se4	E04	SYBR	34.728			34.6693	3.20572	-0.94691	0.94691	0.896638	0.0619792
ZmPMT8	Se4	E05	SYBR	34.6045
ZmPMT8	Se4	E06	SYBR	34.6756
ZmPMT8	Se6	E07	SYBR	35.9286			35.9299	3.1148	-1.03783	1.03783	1.07709	0.0338568
ZmPMT8	Se6	E08	SYBR	35.9644
ZmPMT8	Se6	E09	SYBR	35.8967
ZmPMT8	Se8	E10	SYBR	34.5876			34.5792	2.14104	-1.06467	1.06467	1.13353	0.101797
ZmPMT8	Se8	E11	SYBR	34.6765
ZmPMT8	Se8	E12	SYBR	34.4734
ZmPMT8	Se10	F01	SYBR	33.3647			33.2953	2.7905	-1.36213	1.36213	1.85539	0.0616192
ZmPMT8	Se10	F02	SYBR	33.2746
ZmPMT8	Se10	F03	SYBR	33.2468
ZmPMT8	Se12	F04	SYBR	32.7959			32.7654	3.19144	-0.961187	0.961187	0.92388	0.0265398
ZmPMT8	Se12	F05	SYBR	32.7475
ZmPMT8	Se12	F06	SYBR	32.7528
ZmPMT8	Se14	F07	SYBR	37.2465			37.239	3.42759	-0.725036	0.725036	0.525677	0.0420646
ZmPMT8	Se14	F08	SYBR	37.2769
ZmPMT8	Se14	F09	SYBR	37.1937
ZmPMT8	Se16	F10	SYBR	38.8445			38.8827	3.4491	-0.703523	0.703523	0.494944	0.036272
ZmPMT8	Se16	F11	SYBR	38.8869
ZmPMT8	Se16	F12	SYBR	38.9167
ZmPMT8	Se18	G01	SYBR	36.145			36.1161	3.64172	-0.510905	0.510905	0.261024	0.0254497
ZmPMT8	Se18	G02	SYBR	36.1066
ZmPMT8	Se18	G03	SYBR	36.0969
ZmPMT8	Se20	G04	SYBR	32.2168			32.147	3.60885	-0.543775	0.543775	0.295691	0.0655967
ZmPMT8	Se20	G05	SYBR	32.1376
ZmPMT8	Se20	G06	SYBR	32.0866
ZmPMT8	Se22	G07	SYBR	35.5264			35.4894	3.73513	-0.417493	0.417493	0.174301	0.0892296
ZmPMT8	Se22	G08	SYBR	35.5542
ZmPMT8	Se22	G09	SYBR	35.3877
ZmPMT8	Se24	G10	SYBR	39.6155			39.5638	3.7598	-0.392824	0.392824	0.15431	0.0453727
ZmPMT8	Se24	G11	SYBR	39.5455
ZmPMT8	Se24	G12	SYBR	39.5305
ZmPMT8	Se28	H01	SYBR	36.4255			36.4404	3.79645	-0.356179	0.356179	0.126863	0.0129693
ZmPMT8	Se28	H02	SYBR	36.4467
ZmPMT8	Se28	H03	SYBR	36.4489

## Sheet: Se-ZmPMT9
		Well	Flour	Cq			AVER	ΔCt	ΔΔCt	_ΔΔCt	2_ΔΔCt	SD
actin	Se2	A01	SYBR	31.3544			31.3522
actin	Se2	A02	SYBR	31.4565
actin	Se2	A03	SYBR	31.2456
actin	Se4	A04	SYBR	31.7866			31.7503
actin	Se4	A05	SYBR	31.7677
actin	Se4	A06	SYBR	31.6968
actin	Se6	A07	SYBR	30.8675			30.7943
actin	Se6	A08	SYBR	30.7695
actin	Se6	A09	SYBR	30.7459
actin	Se8	A10	SYBR	29.8568			29.7739
actin	Se8	A11	SYBR	29.5674
actin	Se8	A12	SYBR	29.8976
actin	Se10	B01	SYBR	28.859			28.8714
actin	Se10		SYBR	28.9655
actin	Se10	B03	SYBR	28.7896
actin	Se12	B04	SYBR	30.3457			30.4084
actin	Se12	B05	SYBR	30.3898
actin	Se12	B06	SYBR	30.4898
actin	Se14	B07	SYBR	32.7978			32.7812
actin	Se14	B08	SYBR	32.7565
actin	Se14	B09	SYBR	32.7894
actin	Se16	B10	SYBR	34.8565			34.8994
actin	Se16	B11	SYBR	34.9769
actin	Se16	B12	SYBR	34.8648
actin	Se18	C01	SYBR	31.9565			31.9032
actin	Se18	C02	SYBR	31.8576
actin	Se18	C03	SYBR	31.8957
actin	Se20	C04	SYBR	29.5678			29.6671
actin	Se20	C05	SYBR	29.6787
actin	Se20	C06	SYBR	29.7547
actin	Se22	C07	SYBR	33.2636			33.2992
actin	Se22	C08	SYBR	33.3475
actin	Se22	C09	SYBR	33.2867
actin	Se24	C10	SYBR	34.7867			34.7204
actin	Se24	C11	SYBR	34.6787
actin	Se24	C12	SYBR	34.6957
actin	Se28	D01	SYBR	33.2477			33.3264
actin	Se28	D02	SYBR	33.2658
actin	Se28	D03	SYBR	33.4657
ZmPMT9	Se2	E01	SYBR	35.1966			35.0889	3.73672	0		1	0.0938482
ZmPMT9	Se2	E02	SYBR	35.0457
ZmPMT9	Se2	E03	SYBR	35.0245
ZmPMT9	Se4	E04	SYBR	34.3928			34.4603	2.70992	-1.02679	1.02679	1.0543	0.110303
ZmPMT9	Se4	E05	SYBR	34.4004
ZmPMT9	Se4	E06	SYBR	34.5876
ZmPMT9	Se6	E07	SYBR	35.6793			35.6826	4.88832	1.1516	-1.1516	1.32618	0.0647265
ZmPMT9	Se6	E08	SYBR	35.6196
ZmPMT9	Se6	E09	SYBR	35.749
ZmPMT9	Se8	E10	SYBR	33.7377			33.7974	4.0235	1.31358	-1.31358	1.72548	0.078774
ZmPMT9	Se8	E11	SYBR	33.8867
ZmPMT9	Se8	E12	SYBR	33.768
ZmPMT9	Se10	F01	SYBR	34.2277			34.1076	5.23621	1.4995	-1.4995	2.24849	0.131264
ZmPMT9	Se10	F02	SYBR	33.9675
ZmPMT9	Se10	F03	SYBR	34.1277
ZmPMT9	Se12	F04	SYBR	32.968			32.9636	2.55515	-1.18156	1.18156	1.39609	0.0242023
ZmPMT9	Se12	F05	SYBR	32.9375
ZmPMT9	Se12	F06	SYBR	32.9853
ZmPMT9	Se14	F07	SYBR	37.5946			37.4456	4.66437	0.927655	-0.927655	0.860543	0.12961
ZmPMT9	Se14	F08	SYBR	37.3828
ZmPMT9	Se14	F09	SYBR	37.3594
ZmPMT9	Se16	F10	SYBR	39.4675			39.4504	4.55099	0.814277	-0.814277	0.663046	0.0909709
ZmPMT9	Se16	F11	SYBR	39.3521
ZmPMT9	Se16	F12	SYBR	39.5316
ZmPMT9	Se18	G01	SYBR	36.245			36.2795	4.37629	0.639575	-0.639575	0.409056	0.0329699
ZmPMT9	Se18	G02	SYBR	36.3107
ZmPMT9	Se18	G03	SYBR	36.283
ZmPMT9	Se20	G04	SYBR	32.9517			32.8723	3.20529	-0.531423	0.531423	0.28241	0.0727812
ZmPMT9	Se20	G05	SYBR	32.8567
ZmPMT9	Se20	G06	SYBR	32.8087
ZmPMT9	Se22	G07	SYBR	36.6155			36.6676	3.36836	-0.368354	0.368354	0.135685	0.0475808
ZmPMT9	Se22	G08	SYBR	36.6787
ZmPMT9	Se22	G09	SYBR	36.7087
ZmPMT9	Se24	G10	SYBR	38.8655			38.87	4.14963	0.412917	-0.412917	0.170501	0.0436735
ZmPMT9	Se24	G11	SYBR	38.8288
ZmPMT9	Se24	G12	SYBR	38.9158
ZmPMT9	Se28	H01	SYBR	36.7425			36.7207	3.39432	-0.342398	0.342398	0.117236	0.039687
ZmPMT9	Se28	H02	SYBR	36.7447
ZmPMT9	Se28	H03	SYBR	36.6749

## Sheet: Se-ZmPMT13
		Well	Flour	Cq			AVER	ΔCt	ΔΔCt	_ΔΔCt	2_ΔΔCt	SD
actin	Se2	A01	SYBR	30.5657			30.633
actin	Se2	A02	SYBR	30.7546
actin	Se2	A03	SYBR	30.5787
actin	Se4	A04	SYBR	31.346			31.324
actin	Se4	A05	SYBR	31.2473
actin	Se4	A06	SYBR	31.3787
actin	Se6	A07	SYBR	30.7562			30.7999
actin	Se6	A08	SYBR	30.8538
actin	Se6	A09	SYBR	30.7896
actin	Se8	A10	SYBR	30.3567			30.396
actin	Se8	A11	SYBR	30.3679
actin	Se8	A12	SYBR	30.4634
actin	Se10	B01	SYBR	29.7565			29.807
actin	Se10		SYBR	29.7965
actin	Se10	B03	SYBR	29.8679
actin	Se12	B04	SYBR	29.3563			29.3337
actin	Se12	B05	SYBR	29.2769
actin	Se12	B06	SYBR	29.3679
actin	Se14	B07	SYBR	31.3567			31.323
actin	Se14	B08	SYBR	31.3575
actin	Se14	B09	SYBR	31.2548
actin	Se16	B10	SYBR	33.7897			33.8276
actin	Se16	B11	SYBR	33.7966
actin	Se16	B12	SYBR	33.8965
actin	Se18	C01	SYBR	30.5785			30.5118
actin	Se18	C02	SYBR	30.478
actin	Se18	C03	SYBR	30.4788
actin	Se20	C04	SYBR	28.7364			28.6942
actin	Se20	C05	SYBR	28.6675
actin	Se20	C06	SYBR	28.6787
actin	Se22	C07	SYBR	34.7536			34.7087
actin	Se22	C08	SYBR	34.6769
actin	Se22	C09	SYBR	34.6957
actin	Se24	C10	SYBR	35.6677			35.6429
actin	Se24	C11	SYBR	35.5676
actin	Se24	C12	SYBR	35.6936
actin	Se28	D01	SYBR	32.5784			32.5145
actin	Se28	D02	SYBR	32.4787
actin	Se28	D03	SYBR	32.4863
ZmPMT13	Se2	E01	SYBR	33.4075			33.4711	2.83812	0		1	0.0604564
ZmPMT13	Se2	E02	SYBR	33.5279
ZmPMT13	Se2	E03	SYBR	33.478
ZmPMT13	Se4	E04	SYBR	35.2739			35.3228	3.99882	1.1607	-1.1607	1.34723	0.0429394
ZmPMT13	Se4	E05	SYBR	35.34
ZmPMT13	Se4	E06	SYBR	35.3544
ZmPMT13	Se6	E07	SYBR	34.6175			34.7086	3.9088	1.07068	-1.07068	1.14635	0.083857
ZmPMT13	Se6	E08	SYBR	34.7826
ZmPMT13	Se6	E09	SYBR	34.7258
ZmPMT13	Se8	E10	SYBR	33.4738			33.4569	3.06087	-0.937954	0.937954	0.879757	0.0244215
ZmPMT13	Se8	E11	SYBR	33.4289
ZmPMT13	Se8	E12	SYBR	33.468
ZmPMT13	Se10	F01	SYBR	33.5876			33.5116	3.7046	0.866476	-0.866476	0.750781	0.0694524
ZmPMT13	Se10	F02	SYBR	33.4515
ZmPMT13	Se10	F03	SYBR	33.4957
ZmPMT13	Se12	F04	SYBR	32.8974			32.8668	3.53311	0.694992	-0.694992	0.483013	0.035462
ZmPMT13	Se12	F05	SYBR	32.8279
ZmPMT13	Se12	F06	SYBR	32.8751
ZmPMT13	Se14	F07	SYBR	34.7918			34.7686	3.44565	0.607524	-0.607524	0.369086	0.0374096
ZmPMT13	Se14	F08	SYBR	34.7886
ZmPMT13	Se14	F09	SYBR	34.7255
ZmPMT13	Se16	F10	SYBR	37.0277			37.0726	3.24493	0.406806	-0.406806	0.165491	0.0413382
ZmPMT13	Se16	F11	SYBR	37.109
ZmPMT13	Se16	F12	SYBR	37.081
ZmPMT13	Se18	G01	SYBR	33.7974			33.7766	3.26482	0.426702	-0.426702	0.182074	0.0434181
ZmPMT13	Se18	G02	SYBR	33.8056
ZmPMT13	Se18	G03	SYBR	33.7267
ZmPMT13	Se20	G04	SYBR	31.8924			31.9469	3.25276	0.414639	-0.414639	0.171925	0.0477234
ZmPMT13	Se20	G05	SYBR	31.9675
ZmPMT13	Se20	G06	SYBR	31.9809
ZmPMT13	Se22	G07	SYBR	37.2374			37.183	2.47432	-0.363806	0.363806	0.132355	0.0473726
ZmPMT13	Se22	G08	SYBR	37.1509
ZmPMT13	Se22	G09	SYBR	37.1608
ZmPMT13	Se24	G10	SYBR	38.7965			38.819	3.17601	0.337888	-0.337888	0.114169	0.0225152
ZmPMT13	Se24	G11	SYBR	38.8188
ZmPMT13	Se24	G12	SYBR	38.8416
ZmPMT13	Se28	H01	SYBR	35.6556			35.6673	3.15282	0.314702	-0.314702	0.0990372	0.0274687
ZmPMT13	Se28	H02	SYBR	35.6987
ZmPMT13	Se28	H03	SYBR	35.6476

## Sheet: Se-ZmSFP5
		Well	Flour	Cq			AVER	ΔCt	ΔΔCt	_ΔΔCt	2_ΔΔCt	SD
actin	Se2	A01	SYBR	31.985			31.9157
actin	Se2	A02	SYBR	31.8744
actin	Se2	A03	SYBR	31.8877
actin	Se4	A04	SYBR	30.5547			30.623
actin	Se4	A05	SYBR	30.6868
actin	Se4	A06	SYBR	30.6277
actin	Se6	A07	SYBR	31.8675			31.7937
actin	Se6	A08	SYBR	31.7891
actin	Se6	A09	SYBR	31.7246
actin	Se8	A10	SYBR	32.8767			32.771
actin	Se8	A11	SYBR	32.6793
actin	Se8	A12	SYBR	32.7569
actin	Se10	B01	SYBR	32.3548			31.6502
actin	Se10		SYBR	31.3679
actin	Se10	B03	SYBR	31.2279
actin	Se12	B04	SYBR	30.0255			30.0786
actin	Se12	B05	SYBR	30.1455
actin	Se12	B06	SYBR	30.0648
actin	Se14	B07	SYBR	29.9657			29.9027
actin	Se14	B08	SYBR	29.8568
actin	Se14	B09	SYBR	29.8855
actin	Se16	B10	SYBR	34.9536			34.8855
actin	Se16	B11	SYBR	34.8565
actin	Se16	B12	SYBR	34.8466
actin	Se18	C01	SYBR	28.9546			28.8941
actin	Se18	C02	SYBR	28.8955
actin	Se18	C03	SYBR	28.8321
actin	Se20	C04	SYBR	30.269			30.2182
actin	Se20	C05	SYBR	30.1568
actin	Se20	C06	SYBR	30.229
actin	Se22	C07	SYBR	33.6783			33.7135
actin	Se22	C08	SYBR	33.779
actin	Se22	C09	SYBR	33.6833
actin	Se24	C10	SYBR	36.9568			36.901
actin	Se24	C11	SYBR	36.8568
actin	Se24	C12	SYBR	36.8895
actin	Se28	D01	SYBR	32.3678			32.4216
actin	Se28	D02	SYBR	32.4689
actin	Se28	D03	SYBR	32.428
ZmSFP5	Se2	E01	SYBR	30.2455			30.2181	-1.69755	0		1	0.0303474
ZmSFP5	Se2	E02	SYBR	30.1855
ZmSFP5	Se2	E03	SYBR	30.2235
ZmSFP5	Se4	E04	SYBR	30.0496			29.9795	-0.643518	1.05404	-1.05404	1.11099	0.0637928
ZmSFP5	Se4	E05	SYBR	29.9642
ZmSFP5	Se4	E06	SYBR	29.9247
ZmSFP5	Se6	E07	SYBR	31.1965			31.22	-0.573697	1.12386	-1.12386	1.26306	0.0418097
ZmSFP5	Se6	E08	SYBR	31.2683
ZmSFP5	Se6	E09	SYBR	31.1953
ZmSFP5	Se8	E10	SYBR	33.1474			33.1883	0.417329	1.06085	-1.06085	1.1254	0.0491933
ZmSFP5	Se8	E11	SYBR	33.2429
ZmSFP5	Se8	E12	SYBR	33.1747
ZmSFP5	Se10	F01	SYBR	31.1176			31.1786	-0.471577	1.22598	-1.22598	1.50302	0.0530405
ZmSFP5	Se10	F02	SYBR	31.2137
ZmSFP5	Se10	F03	SYBR	31.2046
ZmSFP5	Se12	F04	SYBR	29.4048			29.43	-0.648597	1.04896	-1.04896	1.10031	0.0254966
ZmSFP5	Se12	F05	SYBR	29.4558
ZmSFP5	Se12	F06	SYBR	29.4294
ZmSFP5	Se14	F07	SYBR	29.1374			29.1128	-0.789895	0.90766	-0.90766	0.823846	0.0416831
ZmSFP5	Se14	F08	SYBR	29.1363
ZmSFP5	Se14	F09	SYBR	29.0646
ZmSFP5	Se16	F10	SYBR	33.9659			33.9787	-0.906802	0.790753	-0.790753	0.62529	0.0146697
ZmSFP5	Se16	F11	SYBR	33.9947
ZmSFP5	Se16	F12	SYBR	33.9756
ZmSFP5	Se18	G01	SYBR	27.9756			27.9591	-0.934985	0.76257	-0.76257	0.581513	0.056756
ZmSFP5	Se18	G02	SYBR	27.8959
ZmSFP5	Se18	G03	SYBR	28.0057
ZmSFP5	Se20	G04	SYBR	29.2046			29.148	-1.07023	0.627324	-0.627324	0.393535	0.0491954
ZmSFP5	Se20	G05	SYBR	29.1243
ZmSFP5	Se20	G06	SYBR	29.1152
ZmSFP5	Se22	G07	SYBR	32.5987			32.6073	-1.10617	0.59138	-0.59138	0.349731	0.0444072
ZmSFP5	Se22	G08	SYBR	32.6554
ZmSFP5	Se22	G09	SYBR	32.5679
ZmSFP5	Se24	G10	SYBR	34.7075			34.7238	-2.17723	-0.479674	0.479674	0.230087	0.0572702
ZmSFP5	Se24	G11	SYBR	34.7875
ZmSFP5	Se24	G12	SYBR	34.6765
ZmSFP5	Se28	H01	SYBR	31.1554			31.1895	-1.23204	0.465513	-0.465513	0.216702	0.0295271
ZmSFP5	Se28	H02	SYBR	31.2063
ZmSFP5	Se28	H03	SYBR	31.2069

[truncated: 30 more sheets: Se-ZmSFP7, Se-ZmSFP9, Se-ZmSFP10, Se-ZmSTP3, Se-ZmSTP7, Se-ZmSTP15, Se-ZmSTP16, Se-ZmSUT1, Se-ZmSUT2, Se-ZmSUT4, Se-ZmTST1, Se-ZmTST2, Se-ZmVGT1, Se-ZmVGT2, Em-1, Em-2, Em-3, Em-4, Em-5, Em-6 …]
