# Supplementary material for: Genome-wide analysis of sugar transporter genes in maize (Zea mays L.): identification, characterization and their expression profiles during kernel development
Source: PeerJ. 2023 Nov 17;11:e16423. doi: 10.7717/peerj.16423 (PMC10658905; doi:10.7717/peerj.16423)
Supplement: Supplemental Information 1 [file peerj-11-16423-s005.xlsx]

## Sheet: Sheet1
MIQE checklist for authors, reviewers, and editors.
Item to check	Importance	checked
Experimental design
Definition of experimental and control groups	E	√
Number within each group	E	√
Assay carried out by the core or investigator’s laboratory?	D	√
Acknowledgment of authors’ contributions	D	√
Sample
Description	E	√
Volume/mass of sample processed	D	√
Microdissection or macrodissection	E	√
Processing procedure	E	√
If frozen, how and how quickly?	E	√
If fixed, with what and how quickly?	E	√
Sample storage conditions and duration (especially for FFPEb samples)	E	√
Nucleic acid extraction
Procedure and/or instrumentation	E	√
Name of kit and details of any modifications	E	√
Source of additional reagents used	D	√
Details of DNase or RNase treatment	E	√
Contamination assessment (DNA or RNA)	E	√
Nucleic acid quantification	E	√
nstrument and method	E	√
Purity (A260/A280)	D	√
Yield	D	√
RNA integrity: method/instrument	E	√
RIN/RQI or Cq of 3_x0002_ and 5_x0002_ transcripts	E	√
Electrophoresis traces	D	√
Inhibition testing (Cq dilutions, spike, or other)	E	√
Reverse transcription
Complete reaction conditions	E	√
Amount of RNA and reaction volume	E	√
Priming oligonucleotide (if using GSP) and concentration	E	√
Reverse transcriptase and concentration	E	√
Temperature and time	E	√
Manufacturer of reagents and catalogue numbers	D	√
Cqs with and without reverse transcription	D	√
Storage conditions of cDNA	D	√
qPCR target information
Gene symbol	E	√
Sequence accession number	E	√
Location of amplicon	D	√
Amplicon length	E	√
In silico specificity screen (BLAST, and so on)	E	√
Pseudogenes, retropseudogenes, or other homologs?	D	√
Sequence alignment	D	√
Secondary structure analysis of amplicon	D	√
Location of each primer by exon or intron (if applicable)	E	√
What splice variants are targeted?	E	√
qPCR oligonucleotides
Primer sequences	E	√
RTPrimerDB identification number	D	√
Probe sequences	D	√
Location and identity of any modifications	E	√
Manufacturer of oligonucleotides	D	√
Purification method	D	√
qPCR protocol
Complete reaction conditions	E	√
Reaction volume and amount of cDNA/DNA	E	√
Primer, (probe), Mg2+, and dNTP concentrations	E	√
Polymerase identity and concentration	E	√
Buffer/kit identity and manufacturer	E	√
Exact chemical composition of the buffer	D	√
Additives (SYBR Green I, DMSO, and so forth)	E	√
Manufacturer of plates/tubes and catalog number	D	√
Complete thermocycling parameters	E	√
Reaction setup (manual/robotic)	D	√
Manufacturer of qPCR instrument	E	√
qPCR validation
Evidence of optimization (from gradients)	D	√
Specificity (gel, sequence, melt, or digest)	E	√
For SYBR Green I, Cq of the NTC	E	√
Calibration curves with slope and y intercept	E	√
PCR efficiency calculated from slope	E	√
CIs for PCR efficiency or SE	D	√
r2 of calibration curve	E	√
Linear dynamic range	E	√
Cq variation at LOD	E	√
CIs throughout range	D	√
Evidence for LOD	E	√
If multiplex, efficiency and LOD of each assay	E	√
Data analysis
qPCR analysis program (source, version)	E	√
Method of Cq determination	E	√
Outlier identification and disposition	E	√
Results for NTCs	E	√
Justification of number and choice of reference genes	E	√
Description of normalization method	E	√
Number and concordance of biological replicates	D	√
Number and stage (reverse transcription or qPCR) of technical replicates	E	√
Repeatability (intraassay variation)	E	√
Reproducibility (interassay variation, CV)	D	√
Power analysis	D	√
Statistical methods for results significance	E	√
Software (source, version)	E	√
Cq or raw data submission with RDML	D	√
