# Supplementary material for: Genome-wide analysis of sugar transporter genes in maize (Zea mays L.): identification, characterization and their expression profiles during kernel development
Source: PeerJ. 2023 Nov 17;11:e16423. doi: 10.7717/peerj.16423 (PMC10658905; doi:10.7717/peerj.16423)
Supplement: Table S1 [file peerj-11-16423-s002.xlsx]

## Sheet: Sheet1
Primer Names		Sequence				amplicons size		Direction
ZmINT1-F		GCATACGGTCGCAAGAAGTCTACTC				87		5' end
ZmINT1-R		GTAAGGACCAGCAGCAGCACAC
ZmINT4-F		AGCAGTTCGTGGGCATCAATACC				84		3' end
ZmINT4-R		TGGCTGTGTTGTTGGACGCATAG
ZmpGlcT2-F		GCAAGCGTTACTGGAAAGTTGTGAG				145		3' end
ZmpGlcT2-R		ACAAGAGCACTAGCAGCAACATCAG
ZmpGlcT4-F		GTGCTGCCATAAGTGCTCTCTCC				83		5' end
ZmpGlcT4-R		ACCCAATCCCATCCCTGTTCCTAC
ZmPMT4-F		TGTCGGTATCCTCCCATCAGTCTTC				103		5' end
ZmPMT4-R		TGCCCTTGCTTCTGAAACTCTCTTC
ZmPMT5-F		TGTCCTTCCTCTCGCTCTCCAAC				136		3' end
ZmPMT5-R		ACGGTGTCCTCCAGGCTCTTG
ZmPMT8-F		CACCGACGACAACAAGCTCCTG				150		3' end
ZmPMT8-R		CCGACGAGCGAGACAATCATTCC
ZmPMT9-F		GAGCGAAGCCGTCAACGATGG				131		5' end
ZmPMT9-R		ATCATAGCCGAGAAGGATGGAGGTC
ZmPMT13-F		TCTCGCTCTACCAGGGCATCAC				92		3' end
ZmPMT13-R		CAGGCAGGCGTACACGAACAC
ZmSFP5-F		CATTACAATGACGGCAAGCCTGATG				142		3' end
ZmSFP5-R		GGCGATTTCCTCTAGCGTTCTTCC
ZmSFP7-F		GTTGGTGTCGTGGCTTATGTCATTG				140		3' end
ZmSFP7-R		AAGGATGTCAACCAGTTGGCAAGG
ZmSFP9-F		CCTGCCGCCTATCACGAGTTTC				136		5' end
ZmSFP9-R		AGGTGGGATTGGATGGATGGAGAG
ZmSFP10-F		ATGGTGTCCTTGGTTGGTGTCTTG				118		3' end
ZmSFP10-R		TTCCTGCCACACTCTTGATGCTAAC
ZmSTP3-F		CGTCGTCATCGCCGTCATCTTC				81		3' end
ZmSTP3-R		CCGAACTTGAGGTGGCACAGC
ZmSTP7-F		CGTTCTTCGTCTTCGGTGGATGG				83		3' end
ZmSTP7-R		CATGGGCAGCTTCTTGGTCTCAG
ZmSTP15-F		CGCTCATCGTCGTCATGTCCATC				107		3' end
ZmSTP15-R		CTTCCAGTACCAGTGCCTGTCAAAG
ZmSTP16-F		GGTGATCTGCCTGTTCGTTCTGG				147		3' end
ZmSTP16-R		GCGATGGCGAAGGTGAAGAGC
ZmTST1-F		AGCAAGCAGGCGTTGGTGTTC				98		3' end
ZmTST1-R		TGGGAGCATCAGTAAGGTCGTCAG
ZmTST2-F		GTTAGCAAAGGTCGGATGGCAGAG				117		5' end
ZmTST2-R		AGTGTCTCCTCCAACCTCCAACC
ZmVGT1-F		TCCTGCGGAGCCGTCTTCTAAG				102		5' end
ZmVGT1-R		CAGTCATCGTCGTCGGTGTAAGC
ZmVGT2-F		CCTGTTCGGCGTCATAGCAGTG				86		3' end
ZmVGT2-R		CGATCTCCTCCAGGCTCAGTCC
ZmSUT1-F		GCGGTCCTATTGCTGGCTTAGTG				130		5' end
ZmSUT1-R		ACAATGACGGCAAGGCAGATGAG
ZmSUT2-F		AAGCCCAGACAACCCAGGAGAG				86		3' end
ZmSUT2-R		GGACGACAGAGTTGAGCATTAGACC
ZmSUT4-F		GTTCGTCTTGGCTTCGGTCTTCTC				88		3' end
ZmSUT4-R		GGCAGATTGGTACGAGTTGGACAG
ZmActin1-F		GGGATTGCCGATCGTATGAG				110		3' end
ZmActin1-R		GAGCCACCGATCCAGACACT
