# Supplementary material for: Genome-wide analysis of sugar transporter genes in maize (Zea mays L.): identification, characterization and their expression profiles during kernel development
Source: PeerJ. 2023 Nov 17;11:e16423. doi: 10.7717/peerj.16423 (PMC10658905; doi:10.7717/peerj.16423)
Supplement: Table S2 [file peerj-11-16423-s003.xlsx]

## Sheet: 进化树 - 副本 - 副本
Name	Sequence
ZmINT1	MTIDMSIPGSSGLLNAAGKRDMKFFSNPYVLALTGAAGIGGFLFGYDTGVISGALLYIRDDFPAVKDNYFLQETIVSMALVGAMIGAAGGGWINDAYGRKKSTLLADLMFALGSLVMCAAAGPYILIIGRLLVGLGVGVASVTAPVYIAEAAPSEIRGGLVSTNVLMITGGQFFSYLINLGFTEVPGTWRWMLGVAAVPAIIQFVLMLFLPESPRWLYWKDEKAKAIAVLERIYESDRLEEEVELLATSSMHEFQSNNTGSYLDVFKSKELRLAFFAGAGLQAFQQFTGINTVMYYSPTIVQMAGFSSNRLALLLSLIVAAMNAAGTIVGIYLIDRCGRRRLALTSLAGVVVSLAILATAFILQSSSGLCMSAASGTCQGALGWFAVAGLALYIAFFSP…
ZmINT2	MEGGAHEFDGSTFKECFSLSWRNPYVLRLAFSAGIGGLLFGYDTGVISGALLYIRDDFVSVDRNTWLQEMIVSMAVAGAIIGAAIGGWTTDRFGRRASILVADSLFFAGAAVMASATRPAQLVVGRVFVGLGVGMASMTSPLYISEASPARIRGALVSTNGFLITGGQFLAYLINLAFTKAPGTWRWMLGVAALPAVVQFGLMLALPESPRWLYRQGRAEEAEAILRRIYSAEEVEREIEELKESVAAERGSSEKLSLVALVRTATVRRGLVAGVGLQVFQQLVGINTVMYYSPTIVQLAGFASNQTALALSLVTSGLNALGSVVSIYFIDRTGRRKLLVISLVGVILSLGVLTAVFHETASHSPAVSATETARFDASLTCPSYRPSSPASGGASWDCT…
ZmINT3	MAVAGAIVGAGAGGWMNDRFGRRPSILIADLLFLAGSIVMAFAPTPAVIIVGRVLVGLGVGMASMTSPLYISEASPARIRGALVSTNGLLITAGQFLSYLINLAFTKVSGTWRWMLGVAGLPALLQFVLMLALPESPRWLYRKDRKREAEEIMRKVYPPEEVEGEIEALRTSVEDDMAQERSLGGAGLAGTLRKAFGSVVVRRGLTAGVLCQVAQQFVGINTVMYYSPTIVQLAGFASNSTAMALSLVTSGLNAAGSLVSMFFVDKAGRRRLMLLSLMGVVVCLGMLSGVFFAVDSHAPDVSLAGTALFGANGTCPEFDLAAVAGVEWTCAQCIKAPSGCGFCADTEKLLPGACLRTSDASRRACRAGRREWYMRGCPSSFGWLALVALGAYIVSYSPG…
ZmINT4	MEGGVTVADKAEFKECLRLSWTQPYILQLVLSAGIGGLLFGYDTGVISGALLYIRDDFAAVEKSTVLRETIVSMAVAGAIVGAAFGGWMNDKFGRRPSIILADALFFGGAVIMAFSPTPRVIIVGRVFVGLGVGMASMTAPLYISEASPARIRGALVSTNGLLITGGQFLAYLINLAFTKVPGTWRWMLGIAGVPALVQFVLMLMLPESPRWLYRKGRKEEAAAILHKIYPANEVEEEIDSMRRSVEEEVLLEGSIGESGFMGKLRKAMGSKVVRRGLTAGVIVQVAQQFVGINTVMYYSPTIVQLAGYASNNTAMALSLITSGLNAIGSIVSMFFVDRAGRRRLMLISLVGIVVWLAVLGGTFLGAAHHAPPVSDLETRLLANQNQTQTQTCPEFNPN…
ZmpGlcT1	MMRCTVTGGGCVASWIGDRRSPAVNPFSVRMSTGNGGWCGGLRSRAAELSGLEMAHLRGGIGGLFRASPRYGRLQATAAVDPEDIPLEKVQVKSSGHVMPYVGVACLGAILFGYHLGVVNGALEYLAKDLGIAENAVLQGWVVSTSLAGATLGSFTGGSLADKFGRTRTFILDAAPLAVGAFLSATAQDIRTMIIGRLLAGIGIGISSALVPLYISEISPTEIRGTLGSVNQLFICIGILAALLAGLPLAGNPAWWRTMFGIAVVPSILLAVGMAFSPESPRWLFQQGKVIQAESAVKRLYGKEMVTEIMYDLRASGQSSSETEAGWFDLFSKRYWKVVSVGAALFLFQQLAGINAVVYYSTSVFRNAGITSDVAASALVGAANVFGTMVASSLMDKQG…
ZmpGlcT2	MMRCAATGGGCVASWSGDRRLPAVNPCSVRMPTGNDGWCAGLRSRAADLAGLEMANLRGGVGGLFRASPRYGRLQATAAVDPEDIPLEKVQVKSSGHVLPYVGVACLGAILFGYHLGVVNGALEYLAKDLGIAENAVLQGWVVSTSLAGATLGSFTGGSLADKFGRTRTFILDAVPLALGAFLSATAQDIRTMIIGRLLAGIGIGVSSALVPLYISEISPTEIRGTLGTVNQLFICIGILAALLAGLPLAGNPAWWRTMFGIAVVPSILLAVGMAFSPESPRWLFQQGKVTQAELAVKRLYGKEMVTEIMFDLRASGQSSSESEAGWFDLFSKRYWKVVSVGAALFLFQQLAGINAVVYYSTSVFRSAGIASDVAASALVGAANVFGTMVASSLMDKQG…
ZmpGlcT3	MPTPLAAALLPLPASPALHFPRPRPGPSWRARPAVVRAAALRALPRRLELCPPCLAAVESNPAPPPLAPPPPDEASAGSGLDARAGGGGGGGDGGGGADLGWLRAFPHVFTASMANFLFGYHIGVMNGPIEDIATQLGFQGNPFLQGLVVSIFIVGAFFGSLGSSALVDKFGCKRTLQIDSIPLIIGALLSAQADSLDEMLLGRFLVGIGIGVNTVLVPIYISEVAPTKYRGTLGTLCQIGTCLGIIAALSLGIPSESDPHWWRTMLYAACVPGILIVAGMQFAVESPRWLAKVGRFDDARKVVESLWEPSEVEKSMEEIKAVVLNDDSRGSWSDLLVEPHNRVALIGGSLFFLQQFAGINGVLYFSSLTFRDVGISSGALASLYVGITNFGGALVASN…
ZmpGlcT4	MRWKLNSSVYKRVPSRETAMEPDVETPMRMTDGGGSGAGPSWRMSLPHVCVATLTSFLFGYHSGVVNEPLEVISADLGFAGNTLAEGLVVSICLGGAFVGCLFSGSIADGIGRRRAFQLSALPMIIGAAISALSNSLEGMLLGRFLVGTGMGLGPPVASLYITEVSPSTVRGTYGSFVQIATCLGIIVSLLIGTPVKDIDRWWRVCFWVAVIPATLQALGMEFCAESPQWLYKCGKISEAEMQFEKLLGPLHVKSAMAELSRYERVDDGESVKYSELFYGRHFNVVFIGTTLFALQQLSGINSVFYFSSTVFRSVGVPSNLANICMGISNLSGSIVAMLLMDKLGRKVLLSGSFLGMAFAMGLQAVGANRQYLGSACVYLSVGGILLFVLSFSLGAGPV…
ZmPMT1	MSNSKQHDAADDGGIPAPEAPAKRPPLNKYALACAVLASMNSILLGYGTRTHDAYNSMHPLAVAICSTRTCASCYLYADVSVMSGAQLFMKQDLKITDTQIEILAGIINIYSLVGSLAAGRTSDWLGRRYTMVLAAAIFFAGALIMGLAPSYTILMLGRFVAGVGVGYALMIAPVYTAEVSPTSARGLLTSFPEVFINTGVLLGYVSNYAFHGLPVHLSWRVMFLVGAVPPIFLALGVLAMPESPRWLVMQGRIGDARRVLAKTSNSPAEAEERLADIKNAIGIPDGVGDNDDDVVVVARRNKGSHGEGVWRDLLIRPTPPVRRILIACLGLQFFQQASGIDSVVLYSPRVFEKAGLRSNNNSLGATMAVGATKTLFILVATFFLDRVGRRPLLLTSAG…
ZmPMT2	MGEEKQRRDGHGGKNKYAVACSIIGSIISILMGYDTGVMSGAMLFIKEDLKTNDTQVQVLAGILNVCALVGSLTAGRVSDWVGRRRTISLAACIFLAGSVLMGLSPNFGTLLAGRCVAGVGVGYALMIAPVYAAEISSAHIRGSVTSLPEICISFGILIGYVANYLLAKLPLVYGWRAMLGLGALPSAVLAVAVLAMPESPRWLVMQGRVEQAHAVLRRVSDTAGEADVRLAEIKTAAGLADDDDGSPRGVGKGVWKEMFLHPTPPVRRILVAAFGVHFFQHLTGIEAVVLYSPRIFKAAGIATRSEILAATIGVGVTKTVFIMTAILLVDRIGRRPLYLSSLAGIIASLACLGLGLTVVERSVPRHSPTWAMALSIATVFTFIASFSIGVGPITWAYS…
ZmPMT3	MMLPSAELSSSNGGGASGLAALPVFLGRKNKYVRMDDVLPSEHEGDDGGGGGGGGGAVHVRGRQSSRRYVFACSVFASLNSVLLGYDVGVMSGCILFIQRDLHINEVQQEVLVGCLSFISLLGSLTGGRTSDAVGRKWTIGLAAVVFQAGAAVMTLAPSFQVLMVGRLLAGVGIGFGVMIAPVYIAEISPAASRGSFTSFPEIFINLGILLGYISNYAFSGLPDHINWRVMLAVGILPSVSIAFALLVIPESPRWLVMQGRADEARAVLLRVTDTEDEAKERLAEIEAAAAAATTGAAGKHGDRNRTVWQELSRPSPVIARMLVTGVGIQCFQQITGIDALVYYSPTIFRDAGIATERQLLAATVAVGFFKTAFIALAIVLIDRVGRKPLLYVSTAGIT…
ZmPMT4	MESVKMRTAMATKREYRRMEAGEEGEELGEAEWARRAEAQRQRRRRGQRYAFSCALFASLNAILLGYDVGVMSGAIIYMQKDLHITEFQQEILVGCLSVVSLLGSLSGGRTSDAIGRKWTMGLGAIVFQIGATIMTFAPSFTVLMIGRLLAGVGIGFGAMVSGVYIAEISPAGARGTLTSLPEICINFGILLGYVSNYAFSGLSEHINWRIMLGVGILPSVFIGFALFVIPESPRWLMMEKRVSEARAVLLQISESEAEAEERLAEIEEAAGLMKSMKSEDKEVWRELLNPSPAVRRMLYAGCGIQLFQQITGIDATVYYSPTIFKDAGIKSDQELLAATVAVGFTKTVFILVAIFLIDRVGRKPLLYVSTIGMTICLFLLGVALTLQNHAVGLMSPRV…
ZmPMT5	MSTATDAVPVAVAPAKRPPINKYAFACALLASMNSVLLGYDISVMSGAQLFMKEDLKITDTQIEILAGVINIYSLFGSLAAGLTSDWLGRRYTMVLAAAIFFTGALLMGFAPGYGFLMVGRFVAGIGVGFALMIAPVYTAEVAPTSARGFLTSFPEVFNNFGILLGYVSNFAFARLPVHLSWRAMFLVGAVPPVFLGVAVLAMPESPRWLVMRGRIDDARRVLQKTSDSPAEAEERLLDIKKVVGIPEGVSDADDVAAIVRASGKGSSSSRHDGVWKELLINPSRPVRRMLMAGLGLMFIQQATGVDCVVMYSPRVFERAGIKSKTNSLGASMAVGACKTFFIPISTLLLDRIGRRPLLLASGGGMAIFLFTLATSLHMMDRRPEGEATALGAVSIAAM…
ZmPMT6	MASAELPGVERKKKSNVTYAFICSILASMASIILGYDIGVMSGAALYIKKDLKITDVQLEILMGILNFYSLIGSFAAGRTSDWIGRRFTVVVAAALFFAGALLMGLAGGYATLMLGRFVAGVGVGYGLMIAPVYTAEVSPASARGFLTSFSEVFINVGILLGYVSNYAFARLPLRLGWRVMLGIGAAPSVLLALMVFGMPESPRWLVMKGRLADARVVLDKIAETPEEAAERLADIKAAAGIPREGADGDVVAVAKRKSAEERRVWKELILSPTPTVRRILLATLGLQFFQQASGVDSVVMYSPRVFQSAGITDDDQLLATTCAVGVTKTVIVLLAAVLLDRVGRRPLMLTSSGGMAVSLVGLATGLTVVGRHPHTEVSWAVGLCVTSTLAFVSFFSIG…
ZmPMT7	MAEQHKGPTNRVASDGLPDGVAPPRKKSNVRFAFACAILASMTSILLGYDIGVMSGAALFIKEDLKISDVEVEVLLGILNLYSLIGSFAAGRTSDWIGRRLTIILAAVIFFVGAFMMGFSVNYPMLMAGRFVAGIGVGYALMIAPVYTAEVSPASSRGFLTSFPEVFINFGILLGYVSNYAFSHLSLKVGWRLMLGVGAAPSVVLALMVLGMPESPRWLVMKGRLADAKVVLGKTSDTPEEAALRLADIKEAAGIPADLDGDVVAVPKRTGGEERVWKELILSPTPAVRRILLSALGIHFFQQSSGIDSVVLYSPRVFQSAGIADKNKLLGTTCAVGVTKTLFILVATFTLDRFGRRPLLLASTGGMVVSLVGLGFGLTVIGHHQEGTTIPWAIGVCIA…
ZmPMT8	MASADLAEAIEPSRKKKSNVKYASICAILASMASVILGYDIGVMSGAAMYIKKDLKITDVQLEILIGILSLYSLIGSFAGARTSDRIGRRLTVVFAAVIFFAGALLMGFAVNYSMLMVGRFVAGVGVGYGGMIAPVYTAEISPAASRGFLTSFPEVFINVGILLGYLSNFAFARLPLRLGWRVMLGIGAAPAGLLALMVLWMPESPRWLVMKGRLADARAVLEKTSASPEEAAERLADIKVAAGIPKGLDGDVVAVPKERSGGEMQVWRELILSPTPAIRRILLSAVGLHFFQQASGSDSVVLYSPTVFKSAGITDDNKLLGVTCAVGVAKTLFILVATFLLDRAGRRPLLLTSTGGMIVSLVGLGTGLTVVGHHPDAKIPSAVALCIASTLAYVAFFS…
ZmPMT9	MQSWSRNLLDYHTDGMIFRKAMEPGKKSNVKYASVCAIMASMACVILGYDIGVMSGAAIYIKKDLKITDVQLEILIGIISLYSLIGSFAGARTSDRIGRRLTVVFAAVIFFVGALLMGFSVNYGMLMVGRFVAGVGVGYGGMIAPVYTAEISPAASRGFLTSFPEVFINLGILLGYLSNYAFAGLPLHLGWRVMLGIGAAPSALLALLVFCMPESPRWLVMKGRLADARAVLEKTSASPEEAAERLADIKVAAGIPKDLDGDVVTVPKERNSGEMQVWKDLILSPTPAIRRILLSAVGLHFFQQASGCDSVVLYSPSVFRSAGITGDNKLLGVTCAVGVTKTLFILVATFLLDRVGRRPLLLTSTGGMVISLISLGTALTVVGHHPDAKIPSVVALCIA…
ZmPMT10	MASDELAKVVEPRKKGNVKYASICAILASMASVILGYDIGVMSGAAMYIKKDLRITDVQLEILIGILSLYSLFGSFAGARTSDRIGRRLTVVFAAVIFFAGSLLMGFAVNYGMLMAGRFVAGVGVGYGGMIAPVYTAEISPAASRGFLTTFPEVFINIGILLGYVSNFAFARLPLHLGWRVMLAIGAVPSALLALLVFCMPESPRWLVLKGRLADARVVLERTSATPEEAAARLADIKAAAGIPRDLDGDVVAVPNKGRDGGSSETQVWKQLILSPTPAVRRILLSAVGLHFFQQASGSDSVVQYSARLFKSAGITDDNKLLGVTCAVGVTKTFFILVATFLLDRAGRRPLLLASTGGMIVSLLSLGAGLTVAGHHPDGKVAWAVALCIASTLAYIAFF…
ZmPMT11	MASDELAKAVEPRKKGNVKYASICAILASMASVILGYDIGVMSGAAMYIKKDLNITDVQLEILIGILSLYSLFGSFAGARTSDRIGRRLTVVFAAVIFFVGSLLMGFAVNYGMLMAGRFVAGVGVGYGGMIAPVYTAEISPAASRGFLTTFPEVFINIGILLGYLSNFAFARLPLHLGWRVMLAIGAVPSGLLALLVFCMPESPRWLVLKGRLADARAVLEKTSATPEEAAERLADIKAAAGIPKGLDGDVVTVPNKEQGGGELQVWKQLILSPTPAVRRILLSAVGLHFFQQASGSDSVVQYSARLFKSAGITDDNKLLGVTCAVGVTKTFFILVATFLLDRAGRRPLLLISTGGMIVSLICLGSGLTVAGHHPDTKVAWAVALCIASTLSYIAFFSI…
ZmPMT12	MKKDDDLESALLAAKEPAPAPAKGYAYALTCALLASLTSIIYGYNRGVMSGAQKFVQADLGVTDAQLEVLIGATSVYSLVGSLAAGWACDRAGRRRTIALSAALFLAGSAVTAAADGYAALMAGQFVAGVACGFGLVVAPVYIAEISPANARGFLSSIPEIAGNSGILLSYIADFALAGLPTPLNWRLMIGIGAVPPLFLAAAAALAMPETPRWLVLHGHRDEARRVLERTVGDADRRLQEILTSVQEATKQAGSGGGDAPSSASVRREILLRPTPAVRRVMLAILGLQVFQQACGVAAMVLYAPRVFSHVGITSERDVLGATVLLGAAKTVAIVVPLFLADSLGRRPMLLTSAGGMAASLLVLGLSIRATSAATCVAAAVAFMATFSLGFGPVIWMYG…
ZmPMT13	MAAHRPNAAAPLLAKLDATATPPAKRNKYPFFCAVLASMTSVLMGYNVAVTSGAQIFMAEDLGMSDAQIEVLSGVINIYSLVGALLAGWTSDRLGRRLTIVLANAFFLVGPLAMALAGGYTLLMVGRFIAGVGVGYALVIAPVYAAEIAPASSRGLLSSLPEIFINTGVMLSYVSNLAFSGLPVHLSWRVMFAAGVVPTVFMAAGVFTMPESPRWLVMKGRVAEAKAVLDKTSDTPAEAEQRLLEIEDVVMDSSGDSGAWKEVATKAGVQRVLATVVTLQFFQQASGIDSVVLYGPRVLAMAGVTSNSLLLSLNILFGVAKVGSILIAMALADRVGRRPLLLVSTSGMTVALLVLGSLFAVFAGAKDNAAVAAVSVVAVMAFVMAFSVGLGPLAWVYSS…
ZmPMT14	MAQAAVGSNDGTEAPLLPSSAGGPTPPPAGAPRRNRFAFVCATLASVTTMLHGYNLTLMSGAELFMREDVGLTDAEVEVLAGSMNVFMLASTLAAGWVADHLGRRRTLVLANAFLMAGALAMSLGTSFAALMAARFVTSLGSGLARVVAPVYNAEISPASTRGALSSMLDVFVNVGILLSYVSNYAFSGLPVHLGWRAMYAVGVVPPVFIAAGVLLVMPESPRWLAMRGRQSDARAVLLRTLDTPAEADLWLGEIKRAVADAEPPPPPAGRGAGASVSIWKQLLVRPSTNVRRILTCVLGLHFFVQASGVDAILLYSPLIFRAVGMASDSAILGATVAMGAVKSCFILVGMLFTDRLGRRPLLLASTAGVAVTATALAVTLYVGTSTTTSTSPATTAAC…
ZmPMT15	MAHADGTADDGATAPLLASSTKSGKPPRRNMYAFACATLASMTTILMGYNLALMSGAQLFIREDLGLSDAQIEVLAGSINVFMLMSILAAGWAADLLGRRGTLVLANVFLMAGALAMSLGASYPALMAARCITSVGSGFSIVVTSVYNAEISPASMRGFLSSFLDMFVSLGLLLSYVSNYAFAGLPVHLGWRTMYAVGVLPPVLLAVGVLAMPESPRWLAMRGRHADARAVLVRTSDTPAEADLRLEEIKQAVKEEPQPQGSSDSDGGNAWKELLVRPSASVRRILVCVVGVHFFQQASGIDAIVLYSPLVFRKAGMSSNKAILGATIGVGVVKMCFVLVATLFSDRLGRRPLLLASTAGVAASMASLGVTLCIGVASAASMAASVLSVLAFMAAFSIG…
ZmPMT16	MADETETAAPLLRSAPLVADAPRRNRFAFVCATLASMTTILMGYNLALMSGAQLFIRQDLGLSDVQVEVLTGSMNLFMLVSILGAGWAADLLGRRGTLVLANAFLMAGALAMSAGGSYAALVAARFVTSVGVGFARVVAPVYNAEISPASTRGVLSSLLDMFINVGILLSYVSNYAFAGLPVHTGWRVMFAVGALPPVFLAAGVLAMPESPRWLVMRGRYGEARAVLLRTTPAEADLRLQEIKEAVEAPRAPADSGGGGGVGVWKEMLWRPTKTVRRILVCAIGVLFFQQASGIDAIVLYSPLVFQKSGMSSNSAILGATVAVGVVKTCFILVATLLSDCVGRRPLLLASAAGSAATLASVALTLCVGSTSTVSTAACVASVLAFVAAFSVGFGPLAPT…
ZmSFP1	MIGAVTSGSLADILGRKMTMRFAAVVGIFGWLTVYFAKDAMMLYAGRVLLGYCTGVLSYVVPVYISEIAPKGIRGGLATSNQLFICSGCSAAYIIGALVSWRCLVVVGLIPCAVLLVGLFFIPESPRWLANIGKEREFHASLQEFRGEDSDISEEATEIKDYIKSVRRLPKAKIQDLFQRKNMYAVTVGVGLMIFQQLGGINALGFYTSYIFSSAGFSGKLGTTLIGVIQIPITFFGALLMDRSGRRALLLVSSSGTFLGCFLTGLSFYFKAQGLCTQLVPTLALCGILVYYAAYSVGMGPVPWVIMSEIFSIDMKAIAGGFVTLASWIGSFAISYSFNFLMDWNPAGTFFLFSAASLVTVLFVAKLVPETKGRTLEEIQTLLKAT
ZmSFP2	MGIMRVADDVEARLVVGAGGGGGTATTTTEPLLRHCHGGRKEEDDQGSKIRDSPEAEGASDCGRTDGGSLRMVLVSTAVAVCGSFEFGTCVGYSAPTQSGIVEEVGLSISEFAIFGSVLTVGAMVGAVTSGRLADFLGRKMTMRISATICIFGWLSIHLAKSAIMLYFGRTLLGFSTGVLSYVVPVFIAEIAPKNLRGGLATSNQLLICSGSSATYIIGALVAWRNLVLVGLVPCVLLLAGLFFIPESPRWLANVGREKEFHASLQKLRGEDADVSEEAIEIKEYIESLYSLPKARLRDLFLSKNIYAVIVGVGLMVFQQLGGINGVGFYASYIFSSAGFSGKLGTILIGIIQIPITLFGAILMDRSGRRVLLMVSASGTFLGCFLTGVSFYLKAQGLF…
ZmSFP3	MAGPMEREGRDAAEKPLLVRVGGSGGSQGGSASSSSVAVVVGCTAIAVAGSFEFGMSIGYSSPTQLGIMRDLRLSLAEYSVFGSILTIGAMLGAIVSGSVADRAGRRGLLEHAGGTQAMAISDVLCALGYLLIGFSQSYWWLDIGRVLIGCGIGILSYVVPVYISEITPKDLRGGFATVNQFMICCGGSLAFVLGTFIAWRTLAIVGVVPCLVQLVGLLLIPESPRWLARFGHPGAFTGALQTLRGHGTDISEEASEIKVFTEKLQRLPKSKMLDLFQKEYIRAVIAGVGLMALQQLGGVNGVLFYASEVFVSAGFSSGNTGTVAMAVVQVPMVGLGVLLMDKAGRRPLLMISAAGTCVGCLLVGLSFLSKEQHWERDLNVLALAGLLVFIGSFSLGMG…
ZmSFP4	MDLEDQEAQKPLLVTAPGRIGDGSHLAESDAASSSSSIAVVVASTAVAVAGSFEFGISVGYSSPSQSGIMRDLSLSLAEYSVFGSILTIGAMLGAVVSGTVADRVGRRSAMAISDLLCIFGYLLITFSQNFWWLDIGRFSIGCGIGLLSYVVPVYISEITPKNLRGGFATVNQFMICCGASLAYVLGTFITWRTLAIIGVAPCLLQLVGLLVTPESPRWLARFGHPGAFEAALQKLRGKGTDISDEATGIKDFTEKLQQLPKSKMLDLFQKDYIRAVTVGVGLMVLQQFGGVNAICFYASEIFVSAGFSSGNTGMLAMVAVQIPMTGLGVILMDKAGRRPLLMVSAAGTCLGCLLVGLSFLAKEHHWGKDLNLVLALAGILIFGGSFSLGMGGIPWVIM…
ZmSFP5	MSFRDQESGGEDGGRTSSASDLRKPLINTGSWYRMPPAGGVMGSRQSSLMERLGSSAFSLRDVAISATLCTLIVALGPIQFGFTCGYSSPTQDAIIADLGLSLSEFSLFGSLSNVGAMVGAISSGQLAEYIGRKGSLMIAAIPNIIGWLAISFAKDSSFLFMGRLLEGFGVGVISYTVPVYIAEIAPQDQRGALGSVNQLSVTIGILLAYLFGMFVPWRILAVLGILPCSILIPGLFFVPESPRWLAKMGKMEDFEYSLQVLRGFQTDITAEVNEIKRSLASSRRRTTIRFADIKQKRYSVPLVIGIGLLVLQQLSGVNGILFYAASIFKAAGITNSNLATFGLGAVQVIATGVTTWLTDKAGRRLLLIISTTGMVITLVIVSVSFFVKDNIAAGSHLY…
ZmSFP6	MGGGSNRGGAGAGEESGSDHDGVLRRPLLNTGSWYRMSSRQSSFAPGTSSMAVLRESHVSAFLCTLIVALGPIQFGFTSGFSSPTQDAMVRDLNLSISEFSAFGSLSNVGGMVGAIASGQMAEYIGRKGSLMIAAIPNIIGWLAISFAKDASFLYMGRLLEGFGVGIISYTVPVYIAEISPQNMRGALGSVNQLSVTFGIFLAYLLGMFIPWRLLAVIGALPCTMLIPGLFFIPESPRWLAKMNLTEDCETSLQVLRGFETDITTEVNDIKRAVASSSKRTTISFQELNQKKYRTPLLLGIGLLVLQNLSGINGVLFYASSIFKAAGVTNSDLATCSLGAIQVLATGVTTWLLDRAGRRILLIISTSGMTLCLLAVSVVFFLKDNISQDSNSYYILTMI…
ZmSFP7	MARSRTSGGGEYESGSDHDGALQKPLLPNSGSWYRMGMGSRQSSLNAAGTSSMAVLRESHVSAFLCTLIVALGPIQFGFTGGYSSPTQASIIRDLNLSISEFSVFGSLSNVGAMVGAIASGQMAEYVGRKGSLMIAAIPNVIGWLAISFAKDSSFLYMGRLLEGFGVGIISYVVPVYIAEISPQNMRGALGSVNQLSVTLGIMFAYLLGLFVPWRLLAVIGTLPCIVLIPGLFFIPESPRWLAKMNMMDDCETSLQVLRGFDADITAELNDIKRAVMSANKRATIRFQELNQKKYRTPLIIGIGLLVLQQLSGINGILFYASSIFKAAGLKDSDLDTFALGAIQVLATFVTTMFLDRAGRRILLIISSAGMTLSLLVVAIVFYIKDNISHDSDLYDILS…
ZmSFP8	MVVAALAQWQWPPPLVAHLPATRGTAAAAGHINQSKPEAGFCAQHSPRALGLLDSGFLLLLLLLITSHSHSASPTHRRPPTQRGAQEQIDPASRPRHATDRAACLPACLRGDHVAPGGGVGPAGNKGASMASNNGGAMQEPLLPKAPKSGGWLWKGTRPSASGDLPSSKAVLRPPRHVPALLCTLIVALGPVQFGFTSGYSSPTQDAVIRDLNLSISEFSAFGSLSNVGAMVGAIASGQMAKYVGRRGSLMIAAVPNIMGWLAISFAKDTTFLYVGRLLEGFGVGVISYVVPVYIAEISPHNMRGALGAVNPLSATFGVLLSYVLGLFFPWRLLALIGTLPCLLLVAGLFFIPESPRWLARMNMMDDCETSLQVLRGFDADITEEVNDIKVSTYFHSSI…
ZmSFP9	MASNSAPGAGYECGSDNDGGLHKPLLPNSGSCQRTGSRQPSLNAAGTSSRAVLRESHVSAFLCTLIVALGPIQCGFTSGYSSPTQDGIIRDLNLSISEFSAFGSLSNVGAMVGAIASGQMAKYIGRRGSLIIAAVPNIMGWLAISFAKHTSFLYMGRLLEGFGVGVISYVVPVYIAEISPQNMRGALGAVNPLSATFGVMFVYVLGLFFPWRLLALIGTLPCLFLIPGLFFIPESPRWLARMNRMDDCETSLQVLRGFNADITAEANDIKIAVTSANKSGTISFQELNQKKNRTPLILGIGLLVLQQLSGINCIVFYSGSIFKAAGLKNSNLDACVLGALEVLATGVTITFLDRAGRRILLIISSCGMTLSLLAVAVVFYIKDNISHDSDMHNILSMVS…
ZmSFP10	MASDGDHGGALQKPLLPKAPRSGGWFRKGTSTARLGAAAAGTSSKAAALRPPHHVPALLCTLVVALGTVQFGFTSGYSSPAQDGVTRDLDLSISEFSVFGSLSNVGAMVGAIASGQMAKYVGRRGSLMIAAVPNVMGWLAISLARDTSFLYVGRLLEGFGVGVISYVVPVYVAEISPQNMRGALGAVNPLSATFGVVFADVLGLFFPWRLLALIGTLPCLLLIPGLFFIPESPRWLARMNMMDECEASLQVLRGVDADITVEANDIKIAVASANKSGAMSFQELNQKKYRTPLILGMGLLVLQQLSGINGIIFYAGSIFKAAGLKNSNLDTCILGVIAVLATAVTTKILDRAGRRILLIISSFGMTLSLLVVAVVFYIKDNISHDSDLGNTLSMVSLVG…
ZmSFP11	MASDGDHGGALQKPLLPKAARGGGWFRKGTSTAHPSGLSAAAAGTSSKAAALRPTHHVPALLCTLVVALGPIQFGFTTGYSSPAQDGVTRDLNLSISEFSAFGSLSNVGAMVGAIASGQMAKYVGRRGSLMIAAVPNIMGWLAISLARDTSFLYMGRLLEGFGVGVISYVVPVYIAEISPQNMRGALGVVNPLSITFGAMLAYVLGLFFPWRLLALIGTLPCLLLIPGLFFIPESPRWLARMNMMDECETSLQVLRGIDADTTAEVNDIKVVVTSTNKSGTIRFLELNQKKYRTPIILATGLLVLQQLSGMNGIIFYSGSIFKAAGLKNSNLDTCVLGAIGVLASVVTTKILDRAGRRILLIISSSGMTLSLLTVAVVFYIKGNISHDSDLGNTLSMVS…
ZmSTP1	MAGGGIVNTGGGKDYPGKLTLFVLLTCIVAATGGLIFGYDIGISGGVTSMNPFLEKFFPEVYRKKQEAKTNQYCKYDNQLLQTFTSSLYLAALVASFFAATVTRAVGRKWSMLVGGLTFLVGAALNGAAQNIAMLIVGRILLGVGVGFANQSVPVYLSEMAPARLRGMLNIGFQLMITIGILAAELINYGTNKIKAGYGWRVSLALAAVPAAIITLGSLFLPDTPNSLLERGHPEEARRMLRRIRGTDDIGEEYADLVAASEEARQVRHPWRNILRRRYRAQLTMAVAIPFFQQLTGINVIMFYAPVLFDTLGFKNDASLMSSVITGLVNVFATVVSIVTVDRVGRRKLFLQGGAQMIVCQLIVGTLIAAKFGTSGTGDIAKGYAAVVVVFICAYVAGF…
ZmSTP2	MPAGGFSVSAPSGVEFEAKITPIVIISCIMAATGGLMFGYDVGISGGVTSMDDFLGKFFPAVLRKKLEDKESNYCKYDNQPLQLFTSSLYLAGLTATFFASYTTRRLGRRLTMLVAGVFFIVGVIFNGAAQNLAMLIVGRILLGCGVGFANQAVPLFLSEIAPTRIRGGLNILFQLNVTIGILFANLVNYGTSKIHPWGWRLSLSLAGIPAALLTLGALFVTDTPNSLIERGRLDEGKAVLKRIRGTDNVEPEFNEIVEASRVAQEVKHPFRNLLQRRNRPQLVIAVLLQIFQQFTGINAIMFYAPVLFNTLGFKSDASLYSAVITGAVNVLSTLVSVYSVDRVGRRMLLLEAGVQMFLSQVAIAIVLGIKVTDHSDNLGHGWAIMVVVMVCTFVSSFA…
ZmSTP3	MAIGGFVEAPAGADYGGRVTSFVVLSCIVAGSGGILFGYDLGISGGVTSMESFLRKFFPDVYHQMKGDKDVSNYCRFDSELLTVFTSSLYIAGLVATLFASSVTRRFGRRTSILIGGTVFVIGSVFGGAAVNVYMLLLNRILLGVGLGFTNQSIPLYLSEMAPPQYRGAINNGFELCISIGILIANLINYGVEKIAGGWGWRISLSLAAVPAAFLTVGAIYLPETPSFIIQRRGGSNNVDEARLLLQRLRGTTRVQKELDDLVSATRTTTTGRPFRTILRRKYRPQLVIALLVPFFNQVTGINVINFYAPVMFRTIGLKESASLMSAVVTRVCATAANVVAMVVVDRFGRRKLFLVGGVQMILSQAMVGAVLAAKFQEHGGMEKEYAYLVLVIMCVFVA…
ZmSTP4	MAGGVVVSSGGGKDYPGKLTMFVLFACIVAATGGLIFGYDIGISGGVTSMNPFLMKFFPSVYRKEQEAERNQSNQYCKFDSQLLTMFTSSLYLAALVASFFAATVTRVAGRKWSMFGGGVTFLVGAALNGAAKDVGMLILGRVLLGVGVGFANQSVPVYLSEMAPARLRGMLNIGFQLMVTIGILCANLINYGTAKIRGGWGWRVSLALAAVPAAIIAVGALFLPDTPNSLIDRGYTDAAKRMLKRVRGTDDVEEEYSDLVAASDESKLVAHPWRNILLPRYRPQLVMAIAIPMFQQLTGINVIMFYAPVLFKTLGFADDASLMSAVITGLVNVFATFVSIVTVDRLGRRKLFLQGGTQMLACQIVVGSLIGAKFGFSGVAEIPKGYAAIVVLFICAYV…
ZmSTP5	MHGGGVVTLSSAGAGDGYSSEITFTVVMSCLMAASGGLIFGYDISITGGLTQMQSFLKAFFPDILEKMNAATQDEYCIFDSQLLTTFVSSLYLAGMFACLVAGHITKKIGRRNSMLIGASLFFVGSVLNCTAVNVAMLVIGRVFLGFAVGFTNQSAPVYLAEIAPARWRGAFTSIFHFFLNVGMFVADLVNYRANTIAVWGWRLSLGVGIVPATVILVGAAFIPDSPNSLVLRGKTDAARASLQRIRGRSADVGVELRDIVQAAEEDRRHESGAFRRIVRREYRPHLVMAVAIPLFFELTGMIVVTLFTPLLFYTIGFTSQKAILGSIITDVVSLVSIAVAAVAVDRVGRRSLFMVGGGILLACLVAMAWIFGAELGTNGEKAMSRPYAVAVVAVVCLF…
ZmSTP6	MAGGVVVNAAGGKTYPGRMTPFVFFTCLVASSGGLIFGYDIGISGGVTSMASFLKEFFPSVYAKAAANKDTNQYCKFDSQLLTLFTSSLYLAALATSFVAASVTRVFGRKWSMFCGGVTFLAGSALNGAATDVMMLIMGRILLGVGVGFANQSVPLYLSEMAPAKLRGMLNIGFQLMTTIGILAANLINFWTAGIEGGWGWRIGLGLAGVPALIITLGALVLPDTPNSLIARGFNDDAKAVLVKIRGTDDVQDEYDDMVAASEEANAIEHPWRNILERRYRPQLTVAALIPFFQQLTGINVIMFYAPVLFLTIGFGDDASLMAAVITGLVNMFATVVSIVCVDRLGRRALFLQGGTQMFVSQIVVGTLIALQFGTAGVGEMSRSNAWLLVLFICLYVAG…
ZmSTP7	MAIGAFVEGAPADGGEGYSGRVTPFVVLSCVVAGSGGVLFGYDLGISGGLTSMDCFLKRFFPKVYRQKQDSKVSHYCEFNSELLTVFTSSLYIAGLVATLAAATITRRYGRRTSMLIGGSVFIAGSVFGGAATNIPMLLMNRILLGIGLGFTNQSIPLYLSEMAPPRYRGAINNGFELCISLGILFANVLNYFVIKITAGWGWRISLSMAALPAAFLTIGAIFLPETPSFIIQRDGNNTDKARVLLQKLRGTASVQKELDDLVRASDLSRATRYPFRSILERKYRPQLVVALLVPFFNQVSGINVVNFYAPVMFRTIGLKESASLLSSVVTRLCATSANVVAMVVVDRVGRRKLFLAGGVQMILSQFTVGAILAAKFRDYEEMGDGYAYLVLTTLCVFV…
ZmSTP8	MAVAAPAAVSTGAGQGKEYPGGLTLYVLLTCAVAATGGLVCGYDIGISGGVTSMDAFLHKFFPSVYRKEQTARGGGSQYCKFDSQLLTAFTSSLYLAAVAASFFVASVARSLGRKWCMFGGGVSFLAGAALNAAAQDVAMLIVGRILLGIGVGFAGLSIPIYLSEMAPHHLRGTLNIGFQLMITVGIFSANLVNYGVAKIRGGWGWRLSLGLAAVLAAVITVGSLFLPDTPNSLIRRGYHEQARQVLARIRGADVDVADEYGDLVSASEASAAVRRPWLDVLGRRYRPQLTMAVLVPFFQQLTGINVIMFYAPVLFKTIGLGGDASLMSAVITGLVNIVATFVSIATVDRLGRRSLFLQGGCQMLVCQIVIGTLIGVQFGASGDGAAIPKASAATVVAF…
ZmSTP9	MPGAVIVHHHTRYKTYPGEVTGIAIFSCFIASVAGCIFGYDIGLTSGLTSTEPFLVKFFPSIYEEMKRQVVVNQYCKFDSQVLTLFSSSLFLAATVATFFAGPMTRAFGRKWTLFAAASAYVVGACIGGVSVNFPMLLTGRVLVGSGVGISIQAAPLYISEVAPAQQRGMLNILFQLMITVGILTANMTNYLASKVSGGWGWRIPVTFGAIPAAVIALGALAIPDTPASLVERGDTATARKTLSQIRGVGDVREEFDDLAAASEDAKAVQCPWRELFFGGKYKPQLTFALLIPFFQQLTGINVIMFYAPVLFKTVGFKQNATLVSSVITGLVNVFSTFVAIATADKIGRRALFLQGGTQMIISQILVGTFIGLQFGMSGTGDISEQYAMCIVLFVCVYV…
ZmSTP10	MAGGTFTEKGKQYPGKMTVFVFLTCLVASSGGLIFGYDIGISGGVTSMDPFLKRFFPSVYAKEQEVVETNQYCKFDSVLLTLFTSSLYLAALVASLFAGYVTKKCGRRMSMLGGGAIFLVGAVLNGFAQNVAMLIVGRIFLGIGVGFSNQSVPLYLSEMAPARMRGMLNISFQLMTTVGILVANLINYFTAKIPGGWGWRIGLGLAAVPAVIMVGGSIFLPDTPNSLVSRGKVESARAMLRRIRGTDDVSLEFDDMVAASEATKAIQNPWGTLLQRRYRPQLVMAVLIPTLQQLTGINVVMFYAPVLFKTIGFGGTASLMSAVITGLVNMFSTFVSIATVDRLGRRKLLLEGGIQMILAQFVLGTLIAVKFGTAGVAAISRPYAIGVVFCICVFVAAFA…
ZmSTP11	MAGGAFTEKGKQYPGKMTVFVFLTCLVASSGGLIFGYDIGISGGVTSMDPFLKRFFPSVYAKEQEVVETNQYCKFDSVLLTLFTSSLYLAALVASLFAGYITKRCGRRVSMLGGGAIFLVGAVLNGLAQNVAMLIIGRIFLGIGVGFSNQSVPLYLSEMAPAKMRGMLNISFQLMTTVGILVANLINYFTAKIPGGWGWRIGLGLAAVPAVIMVGGSIFLPDTPNSLVARGKVESARAMLRRIRGTDDVSLEFDDLVAASEASEAIQNPWGTLLQRRYRPQLVMAVLIPTLQQLTGINVVMFYAPVLFKTIGFGGTASLMSAVITGLVNMFSTFVSIATVDRLGRRKLLLEGGIQMILAQFVLGTLIAVKFGTTGVAAISRPYAIGVVFCICVFVSAFA…
ZmSTP12	MAVGVVAAEGGQDRRYGGRITAFVVLSCMTAGMGGVIFGYDIGIAGGVSSMEPFLRRFFPDVYRRMRGDTRVSNYCKFDSQLLTAFTSSLYVAGLLTTFLASRVTAGRGRRASMVLGGAAFLAGAAVGGASVNVYMVILGRVLLGVGLGFANQAVPLYLSEMAPARLRGAFSNGFQLSVGVGALAANVINFGTEKIGGGWGWRVSLALAAVPAGLLTLGALFLPETPSSLVQQGRDRRDVARLLQKVRGAGVDVGDELDDIVAAGESAAGAGGGGLRRLLVERRYRPQLVMAVAIPFFQQVTGINAIAFYAPVLLRTIGMGESASLLSAVVTGVVGVASTSASMLAVDRFGRRTLFLAGGAQMLASQVLIGAIMAAELRDSGGVGKAWAGVLILLIAVY…
ZmSTP13	MAAGGGDGRQYGGRITVFVVLSCVTAALGGAIFGYDLGTSGGVSSMGSFLEEFFPDVYRRMKGDVRVSNYCKFDSQLLTLFTSSLYIAGLLTAMLLSSWFTARRGRRPSMVIGGAAFLAGAAVSGGAVNVYMAILGRALLGVGLGFANQAVLLYLSEMAPARYRGAFSNGFQLSLCLGSLAANIINYGAEKITGGWGWRLSLGLAGVPAALFTLGAYFLPETPNSLVQQGEDRGRVRALLQKIRGADDTAAVDEELDDIVAANDAARGGGDSGLRLILSRPRYRPQLAIAVLMPAFTQLNGINAIGFYAPVLLRTVGMGESLALLSTVVTVVVYTASTVVFMFVIDRFGRRTLMIAGSLQMLVSELLIGAVMAAKLGDEGGMARGYAAALFVLIGVYVA…
ZmSTP14	MAGGFIGGGGAAAGRAELYEGKITGYFILACIVGSFGGSLFGYDLGVSSGVTSMDDFLRKFFPDVYRRKQAHPHETDYCRYDSQLLTLFTSSLYFAGLVSTFGASYVTKRRGRRASIMVGATSFFLGGAINAAAVNIAMLIVGRVLLGVGIGFGNQAVPLYLSEIAPYRIRGAVNQLFQLTTCLGILVADIINYFTDRLHPWGWRLSLGLAMGPATAIFVGALFLPETPNSLVERGHLEEARRVLEKVRGTRKVDAEFEDLKEASEAARAVPGTFRNLLALRNRPQLVIGALGIPAFQQLSGMNSILFYSPVIFRSLGFGSSAALYSSIITGSMLVVGALLSMVAVDRLGRRFLFIEAGIQMISSMVVIAVILALKFGKGEELSKGVSTVLVVAICLFV…
ZmSTP15	MAGGFGGGGAAAGRAELYEGKITGYFILACIVGSFGGSLFGYDLGVSSGVTSMDDFLVKFFPDVYRRKQAHLHETDYCKYDNQVLTLFTSSLYFAGLVSTFGASYVTKRHGRRASIMVGAASFFLGGAINAAAMNIAMLIVGRVLLGVGIGFGNQAVPLYLSEIAPYRIRGAVNQLFQLTTCLGILVADVINYFTDRLHPWGWRLSLGLAMGPATAIFVGALFLPETPNSLVERGHLEEARRVLEKVRGTHKVDAEFEDLKEASQAARAVTGTFRNLLAVRNRPQLIIGALGIPAFQQLSGMNSILFYSPVIFQSLGFGSSAALYSSIITGSMLVVGALISMVTVDRLGRRFLFIEAGIQMISSMVVVAVILALKFGKGEELSKGVSTVLVVAICLFVV…
ZmSTP16	MAGGGVAALGVKTERAAQYKGRMTLAVATTCLVAAVGGAIFGYDIGISGGVTSMDPFLEKFFPVVFHRKNSGGKNNYCKYDNQGLAAFTSSLYLAGLVASLVASPVTRNYGRKASIVCGGVSFLIGAALNVAAVNLAMLILGRIMLGVGIGFGNQAVPLYLSEMAPAHLRGGLNMMFQLATTLGIFTANLINYGTQNIKPWGWRLSLGLAAVPALLMTLGGLFLPETPNSLIERGRVEEGRRVLERIRGTADVDAEFTDMVEASELANTVEHPFRNILQPRNRPQLVMAVCMPAFQILTGINSILFYAPVLFQSMGFGGNASLYSSVLTGAVLFSSTLISIGIVDRLGRRKLLISGGIQMIVCQVIVAVILGVKFGAEKQLARSYSVAVVVVICLFVLA…
ZmSTP17	MAGGFAVSKSGADGREFKGRITWYVWMCGIVAATSGLMFGYDVGISGGVTAMDDFLELFFPSVYARKHRARENNYCKFDDQRLQLFTSSLYLAALVASFVASRACSRFGRKRTMQAASVFFLAGTALCASATNIAMLIVGRVCLGVGVGFGNQAAPLFLSEIAPAHVRGALNILFQLNVTVGILIASVVNYFASRAHPLGWRYALGGAAAPAAVLFLGSLAITETPTSLVERGRTDAGRRTLEKIRGTADVGAEFDEIRAACDLARALGEEEKPYRRLMRPESRPPLVIAIAMQVFQQFTGINALMFYAPVLFQTMGFETDGSLLSAVVTGSVNVVSTVVSIVLVDRVGRRKLLLEACAQMLVAQTAVGAIMLVHVRANNNPSQSWAVAIVVLICVYVS…
ZmSTP18	MTGGEALAVGSGGGGGSITFAVAMSCLTAASGGLLLGYDISVTGGLMQMESFLQAFFPNILKKTNNAQQDTYCIFKNQVLTLFVSSLYLAAILSNLVSGHSTRTMGRRNSMMIGGMFFLAGAILNTSAVHISMLIIGRILLGFAVGFTSLSAPVYLAEIAPARWRGAFTTCYHFFFNLGMFMADMVNYGTNSIPRWGWRLSLGVGLVPAAVVIVGAAVIPDTPSSLVLRGRLDEARASLRRIRGAGAASADTDAELKDIVRAVEQDRRHESGAFWRLCRREYRPHLLIAVATPVFFDLTGVIVVSVFTPLLFYTVGFTNQKAILGSIITDVVSLASIAVAGLAVDRYGRRSLLMLGSAVLILSQVAMAWIFGAQLGTDGGKSMPRGYAVAVVALVCVYT…
ZmSTP19	MDSFLNKFFPEVLRGMKSAKRDAYCKYDNQLLTAFTSSMYIAAMLASLVASSVTRRVGRKAVMLIGGIMFLAGSVINAGAVNVAMLIVGRILLGFGVGFTAQAAPLYLAEISPTRWRGGFTTAYHFFLVAGTLAANVANYVTNRIPDWGWRVSLGLAAVPSAVIVMGALLVSDTPSSLVLRGEPYAARASLQRVRGAGADVEAELKDIICAVEAARRDEEEGAFRRLRAEGYRHYLVMMVAIPAFFDLTGMVVISVFSPVLFRTVGFDSQRAIFGAVIISLVSLCGVALSTLAVDRCGRRFLFLAGGTAMLLFQVAVSWVLADHLGKHQAVTMPKNYAMGVVVLVCLYTFSFSMSWGPLKWVVPSEIYPVEIRSAGQAITLSVALTLSFTQTQVFISML…
ZmSTP20	MTGGGFAAAEGGHARDDYGGGVTVSVVVTCLMAASCGLIFGYDIGVSGGVTQMESFLAKFFPEVSSGTKDAKHDAYCKYDDQRLTAFTSSLYIAAMLSSLVASRVTRTVGRQAVMLMGGVLFLLGSAINAGAVNVAMLILGRMLLGFGVGFTTQAAPLYLAETSPARWRGAFTAAYSIFQVLGALAATVTNYLTNRVPGWGWRVSLGLAAVPAAIVVLGALLVPDTPSSLVLRGDADGARASLQRLRGPGAETDAELKDIVRAVERARRDDEGAYGRLCAKGYGHYLVMVVAIPSFFDLTGVIVMAVFSPVLFRTVGFSSQKAIFGSVILSLVNLASSLLSSFVLDRAGRRFLFIVGGAAMMICQLAMSCILAGHLGKQNAVTMPRDYAVAVLVLMCLY…
ZmSUT1	MARGDGELELSVGVRGTGGAAAAAAADHVAPISLGRLILAGMVAGGVQYGWALQLSLLTPYVQTLGLSHALTSFMWLCGPIAGLVVQPLVGLYSDRCTARWGRRRPFILIGCMLICLAVIVVGFSSDIGAALGDTKEHCSLYHGPRWHAAIVYVLGFWLLDFSNNTVQGPARAMMADLCGHHGPSAANSIFCSWMALGNILGYSSGSTNNWHKWFPFLLTNACCEACANLKGAFLVAVVFLVMCLTVTLFFANEVPYRGNQNLPTKANGEVETEPSGPLAVLKGFKNLPTGMPSVLLVTGLTWLSWFPFILYDTDWMGREIYHGDPKGSNAQISAFDEGVRVGSFGLLLNSIVLGFSSFLIEPMCRKVGPRVVWVTSNFMVCVAMAATALISFWSLKDY…
ZmSUT2	MPPRTAPAATSTPPRKVPLRKLLRAASVACGVQFGWALQLSLLTPYVQELGIPHAFASLVWLCGPLSGLLVQPLVGHLSDRIGPAASPLGRRRPFIAAGAACIAAAVLTVGFSADLGRLFGDDVTPGSTRLGAICVYLVGFWLLDVGNNGTQGPCRAFLADLTENDPRRTRIANAYFSLFMALGNILGYATGAYSGWYSIFPFTVTESCGISCANLKSAFLLDIIVLVITTYTTVTSVQEPQTFGSDEAQNPGAEQEAFLWELFGSLRYFTLPIWMVLIVTALTWMAWFPFTLFDTDWMGREIYRGSPDNPGETQRYHDGVRMGSFGLMLNSVVLGFTSVVLEKLCRKWGAGLVWGVSNILMTLCFLAMLVITYVAKNMDYPSSGAPPTGIVVASLVVF…
ZmSUT3	MAGDGMEVSASGGGGGNKQPQISLLGLFLACMVAGGVQYGWALQLSLLTPYVQTLGIPHALTSVMWLCGPIAGLLVQPCVGLYSDKCTSKLGRRRPFIFTGCIIICISVIVIGFSSDIGYALGDTTEDCNVYTGKRLHAALFFVMGFWLLDFSNNTVQGPARALMADLAGSHGPSTANAIFVSWMAIGNILGYSSGSTDKWHTWFPFLQTRACCEACANLKAAFLVSVVFLGLSTVVTMIFAREVPLDPAAAAKQDEAGESSGPFAVFKGMKNMPPGMPQVLIVTGLTWLSWFPFILFDTDWMGREMYHGRPDGSPEEVARFQEGVRQGAFGLLLNSVVLGASSFLIEPMCRKLTAKVVWVMSSFLVCVAMALVTVLSSWSLGDIGGNVQDAAAVDKGL…
ZmSUT4	MDAGAGATAIRVPYRHLRDAEMELVSLNGGAPGGDTGPPPPPPKDQPRSRADRTKLVLACMVAAGVQFGWALQLSLLTPYIQTLGIDHAMASFIWLCGPITGFVVQPCVGVWSDKCRSKYGRRRPFILAGCIMICAAVTLIGFSADLGYILGDTTEHCRTYKGSRFRAAIVFILGFWMLDLANNTVQGPARALLADLSGPDQCNSANAIFCSWMAVGNILGFSAGASGEWHKWFPFLTTRACCEACGNLKAAFLVAVVFLLLCMSVTLYFAEESPLDPKDTQGLSDSAPLLNGSRDAAHASNEPNNERFPNGHVGLNNVSANNNTEEFTNVNSNTEKGGVFNDGPGAVLVNILTRMRHLPPGMHSVLLVMALTWLSWFPFFLFDTDWMGREVYHGDPNG…
ZmSUT5	MNGDGSKEDANRRLEWATLNMERAVVVSETTKGDGNGNAGRKAPISIVRLFLACMVSGGIQYGWALQLSLLSPYSQTLGISHSYVSLTWICGPIAGFVVQPIVGYYSDRCTSKMGRRRPFILAGCIIICLSVLVIGFSADIGRRLGDTKEHCSTFTGSRWSAAAVYIVGFWFLDFANNTVQGPARAMMADLAAGQHGPNVGQAIFSLWMALGSVLGYLSGANAKWHDWLPWLKTAACCDACANLKGAFLTAVVLIIISMSVTLWLAGEERLDKESVDTSGGACSAFMDLFKSLKNLPPAMFSVLAVTAVTWLSWFPFFQYNTDWMGREIFHGEPQGSGSKADLYEAGVREGAIGLLFCSVALGVTSFFIPRLCRKLTSRVVWSVSSLMVFVLMTAMVVL…
ZmSUT6	MGGHSKEDARRLEWATLNLERGVVGGGGETTGYGNASLKPAIGLVRLFSACMVSGGIQYGWALQLSLLSPYSQTLGISHSYVSLTWICGPIAGFVVQPIVGYYSDRCTSKMGRRRPFILAGCIIICLSVLMIGFSADIGRRLGDTTEHCSTFTGSRWYAAAVYIVGFWFLDFANNTVQGPARAMMADLAAGHHGPNVGQAIFSLWMALGSVLGYLAGANAKWHEWFPWLKTAACCDACANLKGAFLTAVVLIVVTMSATLWLAGEEQKQLDKDDVDASGGACSAFVDLFKCLKNLPPAMFSVLAVTAVTWLAWFPFFQYNTDWMGREIFHGEPQGAGGKADLYNAGVREGAVGLLLCSVALGVTSLLIPKLCRKLTSRVVWSVSNLMVFILMAAMVILG…
ZmSUT7	MARGDGGQLAELSAGVRGAAAVVDHVAPISLGRLILAGMVAGGVQYGWALQLSLLTPYVQTLGLSHALTSFMWLCGPIAGLVVQPLVGLYSDRCTSRWGRRRPFILTGCMLICVAVIVVGFSSDIGAALGDTKEHCSLYHGPRWHAAIVYVLGFWLLDFSNNTVQGPARAMMADLCDHHGPSAANSIFCSWMALGNILGYSSGSTNNWHKWFPFLKTSACCEACANLKGAFLVAVVFLVLCLTVTLIFAKEVPYRANENLPTTKAGGEVETEPTGPLAVLKGFKDLPPGMPSVLLVTAITWLSWFPFILYDTDWMGREIYHGDPKGSNAQISAFNEGVRVGAFGLLLNSVILGFSSFLIEPMCRKVGPRVVWVTSNFMVCVAMAATALISFWSLRDYHG…
ZmTST1	MGGAVMVAIAASIGNLLQGWDNATIAGAVLYIKKEFNLQSEPLIEGLIVAMSLIGATVITTFSGAAADCVGRRPMLVASAVLYFVSGLVMLWAPSVYILLLARLIDGFGIGLAVTLVPLYISETAPTDIRGLLNTLPQFSGSGGMFLSYCMVFGMSLMPKPDWRLMLGVLSIPSLIYFGLTVFYLPESPRWLVSKGRMAEAKRVLQRLRGREDVSGEMALLVEGLGVGKDTRIEEYIIGPDDELADEGLAPDPEKIKLYGPEEGLSWVARPVRGQSALGSALGLISRHGSMAASQGKPLVDPMVTLFGSVHEKMPEIMGSMRSTLFPNFGSMFSVADQQQVKADWDAESQREGEDYASDHGGDDIEDNLQSPLISRQATSVEGKEIAAPHGSILGAVGR…
ZmTST2	MSGAVLVAIVASIGNLLQGWDNATIAAAVLYIKKEFQLQNEPTVEGLIVSMSLIGATIVTTFSGPLSDSIGRRPMLILSSILYFFSGLIMLWSPNVYVLLLARFVDGFGIGLAVTLVPLYISEIAPSEIRGLLNTLPQFSGSGGMFLSYCMVFGMSLSPSPDWRIMLGVLAIPSLFFFGLTIFYLPESPRWLVSKGRMAEAKKVLQKLRGKDDVSGELSLLLEGLEVGGDTSIEEYIIGPATEAADDLVTDGDKEQITLYGPEEGQSWIARPSKGPSMLGSVLSLASRHGSMVNQSVPLMDPIVTLFGSVHENMPQAGGSMRSTLFPNFGSMFSVTDQHAKNEQWDEENLHRDDEEYASDGAGGDYEDNLHSPLLSRQATGAEGKDIVHHGHRGSALSM…
ZmTST3	MQGAVLVAIAAAIGNLLQGLDNAAIAAAVLYIKREFHLETDPALEGVVVATSLFGATIVTIFSGPVSDVIGRRPMLIVSSLLYFAGGLLMLWSPSVPVLLVARLVDGFGVGLAVTLVPVYISETAPPEIRGFLNTLPQLTGSLGMFLSYCMIFYMTLGDSPSWRFMLGVLSVPSLAYLALTVLYLPESPRWLVSKGRMKEARAILQMLRGREDVSGEMALLVEGLGSSDDTVIEEYVLGPAAAGDESEHETRDQVTLYGPEQGLSWVAQQVQGARSSVLGSAVGLASRQGSMYEQMKDPVVTLLGSVHDKMPDSGASARASTLFPNLGSMLSVTERHGGDWDEENVPPNDDLDDDEDEEEYLSDDEDAGAGAAARGGGGGGGALHAPLLSRQSTDVDVT…
ZmTST4	MKSTVFSTAVVSIGYALLGWDFAALSEANHHMEKEFELLNGPSIEGITLAASTFGAIVITIFSGALLDWLGRRVILVYSSLVLFSGGVLMLWSPNIYIVLLARLIVGSGSGLVFTCVPIYISETSPSNMRGLLGTMPQFMFFIGTIFSYCLIFWLTLMSSPSWRIMIGAIFAPSIVYFALLVYYLPESPRWLASDGKISEARVSLQWLRGKKHDVSGEIAAIVEGVDIISDSTVGAARAQSFSGTSASHTWPRSTFYWQLSDPLVDLLGSVHENMSEGGSRRNSFFPVFNSFSFPEHEHMNEHRDGNSDQQTRETYYAGEANNGDGLRASLLSQAASVEVNDTNTSFTSEGSSSYLRRHGTSVLAQEFMASIHDYDIEEEEEEIHGFALPHQSAPRDME…
ZmVGT1	MASHPPPAEPSSKSNKQGQSEHEEIHVSSGGVLAYTDDDDCESRRPLLLRTPASAECYSVSAAVFPFLFPALGGLLYGYDIGATSGATISLKSSTFSGTTWYNLSSVQTGLVVSGSLYGALIGSVLAYTIADFLGRRKELILASISYFIGAFLTAVAPNFTIMVVGRFLYGIGIGLAMHAAPMYIAETAPSQIRGMLISLKEFFIVLGMLLGYIAGNLYVEVVSGWRYMYASSTPLCLIMGVGMCWLPSSPRWLLLCAIQGKGNLPETKENATRCLCRLRGQASPDLVSEQIDLILEELSYIDQEKQASFGEIFQGKCLKAMIIGCGLVFFQQVTGQPSVLYYAATIFQSAGFSGASDATRVSILLGLLKLIMTGVAVLVVDRLGRRPLLIGGVSGITV…
ZmVGT2	MATIGLVPSTVVASTAIRAPAPAALTRASNRQPPHARRLLDLGRRAPAMDALRVSGAAEPLLRPAAAGGHPRLRVRTRAQQGDGGAAAEGDAAFSWAPVVLPFLFPALGGLLFGYDIGATSGATISVQSPDLSGTDWFSLSSLQLGLVASGSLYGALGGSLLAYRIADFLGRRIELVTAAALYILGALVTGFAPNFVALIIGRVLYGIGIGLAMHGAPLYIAETSPSQIRGTLISLKELFIVLGILLGYLVGSLEIDNVGGWRYMFGFSAPLAAIMAIGMWTLPSSPRWLLLRAVQGKASLEDNKKKAIQALRTLRGRTASEKVLADDVDDTIVSIKAAYAGQEAEGNVWDVFEGASLKAFTIGGGLVLFQQITGQPSVLYYAASILQTAGFSAASDAA…
