# Supplementary material for: Genome-wide analysis of sugar transporter genes in maize (Zea mays L.): identification, characterization and their expression profiles during kernel development
Source: PeerJ. 2023 Nov 17;11:e16423. doi: 10.7717/peerj.16423 (PMC10658905; doi:10.7717/peerj.16423)
Supplement: Table S3 [file peerj-11-16423-s004.xlsx]

## Sheet: Sheet1
Motif ID	Motif Sequence	E-value	length	Pfam
Motif 1	MLIVGRFLLGVGVGFASQVVPVYJAEISPARIRGALNSLFZ	2.4e-1106	41	Sugar_tr; PF00083
Motif 2	YVAAFSWGWGPIPWLVPSEIFPLRIRAAG	3.1e-771	29	Sugar_tr; PF00083
Motif 3	PESPRWLVMRGRLDEARAVLZ	2.6e-532	21	Sugar_tr; PF00083
Motif 4	FVYLFLPETKGRPLE	6.3e-458	15	Sugar_tr; PF00083
Motif 5	PRYRRQLVIGVGJPFFQQLTGINAVVFYSPVIFKTAGFSSD	5.0e-964	41	Sugar_tr; PF00083
Motif 6	DRLGRRPLLJISGAG	1.9e-352	15	No annotation
Motif 7	ASMGGLJFGYDIGVSSGATSM	8.3e-313	21	Sugar_tr; PF00083
Motif 8	FTSSLYLAALVGSLAAGRVTDRLGRRGTM	5.4e-434	29	Sugar_tr; PF00083
Motif 9	LFINVGILLAYLSNYAFAKJPGHWGWRVM	1.7e-341	29	Sugar_tr; PF00083
Motif 10	GVAVNRVTSFVISQTFLSLLC	5.6e-241	21	No annotation
Motif 11	GTADVEEELADIKAAVESARA	3.5e-184	21	No annotation
Motif 12	VJAAVIFLAGALLMGFAVNVA	2.2e-183	21	No annotation
Motif 13	QYGWALQLSLLTPYVQTLGISHALTSLMWLCGPIAGLVVQPLVGLYSDRC	2.6e-166	50	MFS_1; PF07690
Motif 14	EMELVWRRHWFWKRFVRDDPK	1.8e-160	21	No annotation
Motif 15	HGPNVANAIFSSWMALGNILGYSSGATNKWHKWFPFLKTAACCEACANLK	1.8e-149	50	No annotation
